# Supplementary material for: Multi-Level Biomarkers for Early Diagnosis of Ischaemic Stroke: A Systematic Review and Meta-Analysis
Source: MDPI journal article supplement (doi:10.3390/ijms241813821), 2023-09-07
Supplement: s1 [file s1]

**Multi-level blood biomarkers for early diagnosis of ischaemic stroke: a systematic review and meta-analysis**

Qianyun Li<sup>1</sup>, Lingyun Zhao<sup>1</sup>, Ching Long Chan<sup>1</sup>, Yilin Zhang<sup>1</sup>, See Wai Tong<sup>1</sup>, Xiaodan Zhang<sup>1</sup>, Joshua Wing Kei Ho<sup>2</sup>, Yaqing Jiao<sup>1</sup>, Timothy Hudson Rainer\*<sup>1</sup>

<sup>1</sup>Department of Emergency Medicine, University of Hong Kong, Hong Kong-SAR, China

<sup>2</sup>School of Biomedical Sciences, University of Hong Kong, Hong Kong-SAR, China

Index of appendices

Supplementary Table 1: Search strategies .....2

Supplementary table 2: Concise characteristics of 182 included studies.....6

Supplemental Table 3: Brain-specific or enriched biomarkers for diagnosis of ischaemic stroke in early stage.....17

Supplementary Table 4: Characteristics of included high-throughput omics studies.....20

Supplementary List 5: List of omics biomarkers pooled from high-throughput omics studies .....24

Supplementary Table 6: Quality assessment results using QUADAS-2.....26

Supplementary Table 7: Characteristics of included 10 studies for diagnostic meta-analysis.....33

References.....34

## Supplementary Table 1: Search strategies

### PubMed: 1971 to 4 June 2022

|    |                                                                                                                                                                                                                                                               |
|----|---------------------------------------------------------------------------------------------------------------------------------------------------------------------------------------------------------------------------------------------------------------|
| #1 | Blood[MeSH] OR blood[Title/Abstract] OR plasma[Title/Abstract] OR serum[Title/Abstract]                                                                                                                                                                       |
| #2 | “Biomarkers”[MeSH] OR biomarker*[Title/Abstract] OR “biological marker”[Title/Abstract] OR “biologic marker”[Title/Abstract] OR “serum marker”[Title/Abstract] OR “biochemical marker”[Title/Abstract] OR “laboratory marker”[Title/Abstract]                 |
| #3 | Diagnosis[MeSH] OR diagnos*[Title/Abstract] OR differentiat*[Title/Abstract]                                                                                                                                                                                  |
| #4 | Stroke[MeSH] OR “stroke”[Title/Abstract] OR “cerebrovascular accident”[Title/Abstract] OR “brain vascular accident”[Title/Abstract] OR “brain infarct”[Title/Abstract] OR “intracerebral hemorrhage”[Title/Abstract] OR “cerebral hemorrhage”[Title/Abstract] |
| #5 | 1 AND #2 AND #3 AND #4                                                                                                                                                                                                                                        |

### Ovid Embase: 1974 to 4 June 2022

|     |                                                |
|-----|------------------------------------------------|
| #1  | 'blood'/exp                                    |
| #2  | blood:ab,ti OR plasma:ab,ti OR serum:ab,ti     |
| #3  | #1 OR #2                                       |
| #4  | 'biological marker'/exp                        |
| #5  | biomarker:ab,ti OR biomarkers:ab,ti            |
| #6  | biologic:ab,ti AND marker:ab,ti                |
| #7  | biologic:ab,ti AND markers:ab,ti               |
| #8  | biochemical:ab,ti AND marker:ab,ti             |
| #9  | biochemical:ab,ti AND markers:ab,ti            |
| #10 | laboratory:ab,ti AND marker:ab,ti              |
| #11 | laboratory:ab,ti AND markers:ab,ti             |
| #12 | #4 OR #5 OR #6 OR #7 OR #8 OR #9 OR #10 OR #11 |

|     |                                                                                                                       |
|-----|-----------------------------------------------------------------------------------------------------------------------|
| #13 | 'diagnosis'/exp                                                                                                       |
| #14 | diagnosis:ab,ti OR diagnoses:ab,ti OR diagnose:ab,ti OR diagnostic:ab,ti OR diagnostics:ab,ti OR diagnostically:ab,ti |
| #15 | differentiation:ab,ti OR differentiate:ab,ti OR differentiating:ab,ti OR differentiability:ab,ti                      |
| #16 | #13 OR #14 OR #15                                                                                                     |
| #17 | 'cerebrovascular accident'/exp                                                                                        |
| #18 | stroke:ab,ti OR strokes:ab,ti                                                                                         |
| #19 | cerebrovascular:ab,ti AND accident:ab,ti                                                                              |
| #20 | cerebrovascular:ab,ti AND accidents:ab,ti                                                                             |
| #21 | brain:ab,ti AND vascular:ab,ti AND accident:ab,ti                                                                     |
| #22 | brain:ab,ti AND vascular:ab,ti AND accidents:ab,ti                                                                    |
| #23 | brain:ab,ti AND infarction:ab,ti                                                                                      |
| #24 | brain:ab,ti AND infarct:ab,ti                                                                                         |
| #25 | cerebral:ab,ti AND hemorrhage:ab,ti                                                                                   |
| #26 | intracerebral:ab,ti AND hemorrhage:ab,ti                                                                              |
| #27 | #17 OR #18 OR #19 OR #20 OR #21 OR #22 OR #23 OR #24 OR #25 OR #26                                                    |
| #28 | #3 AND #12 AND #16 AND #27                                                                                            |

### **Cochrane library: 1993 to 4 June 2022**

|    |                                                                                                                                               |
|----|-----------------------------------------------------------------------------------------------------------------------------------------------|
| #1 | MeSH descriptor: [Blood] this term only                                                                                                       |
| #2 | MeSH descriptor: [Plasma] this term only                                                                                                      |
| #3 | MeSH descriptor: [Serum] this term only                                                                                                       |
| #4 | (blood):ti,ab,kw OR (plasma):ti,ab,kw OR (serum):ti,ab,kw in Trials (Word variations have been searched)                                      |
| #5 | #1 OR #2 OR #3 OR #4                                                                                                                          |
| #6 | MeSH descriptor: [Biomarkers] this term only                                                                                                  |
| #7 | (biomarker):ti,ab,kw OR (biomarkers):ti,ab,kw in Trials (Word variations have been searched)                                                  |
| #8 | (biological):ti,ab,kw OR (biologic):ti,ab,kw OR (biomedical):ti,ab,kw OR (laboratory):ti,ab,kw in Trials (Word variations have been searched) |

|     |                                                                                                                                                                            |
|-----|----------------------------------------------------------------------------------------------------------------------------------------------------------------------------|
| #9  | (marker):ti,ab,kw OR (markers):ti,ab,kw in Trials (Word variations have been searched)                                                                                     |
| #10 | #8 AND #9                                                                                                                                                                  |
| #11 | #6 OR #7 OR #10                                                                                                                                                            |
| #12 | MeSH descriptor: [Diagnosis] this term only                                                                                                                                |
| #13 | (diagnoses):ti,ab,kw OR (diagnose):ti,ab,kw OR (diagnostic):ti,ab,kw OR (diagnostics):ti,ab,kw OR (diagnostically):ti,ab,kw in Trials (Word variations have been searched) |
| #14 | (differentiate):ti,ab,kw OR (differentiation):ti,ab,kw OR (differentiating):ti,ab,kw OR (differentiability):ti,ab,kw in Trials (Word variations have been searched)        |
| #15 | #12 OR #13 OR #14                                                                                                                                                          |
| #16 | MeSH descriptor: [Stroke] this term only                                                                                                                                   |
| #17 | (stroke):ti,ab,kw in Trials (Word variations have been searched)                                                                                                           |
| #18 | (cerebrovascular):ti,ab,kw AND (accident):ti,ab,kw in Trials (Word variations have been searched)                                                                          |
| #19 | (brain):ti,ab,kw AND (vascular):ti,ab,kw AND (accident):ti,ab,kw in Trials (Word variations have been searched)                                                            |
| #20 | (brain):ti,ab,kw AND (infarction):ti,ab,kw in Trials (Word variations have been searched)                                                                                  |
| #21 | (cerebral):ti,ab,kw AND (hemorrhage):ti,ab,kw in Trials (Word variations have been searched)                                                                               |
| #22 | (intracerebral):ti,ab,kw AND (hemorrhage):ti,ab,kw in Trials (Word variations have been searched)                                                                          |
| #23 | #16 OR #17 OR #18 OR #19 OR #20 OR #21 OR #22 in Trials                                                                                                                    |
| #24 | #5 AND #11 AND #15 AND #23 in Trials                                                                                                                                       |

#### Web of science: 1900 to 4 June 2022

|    |                                                  |
|----|--------------------------------------------------|
| #1 | blood (Topic) or plasma (Topic) or serum (Topic) |
| #2 | biomarkers (Topic) or biomarker (Topic)          |
| #3 | biological (Topic) and marker (Topic)            |
| #4 | biologic (Topic) and marker (Topic)              |

|     |                                                                                                                                   |
|-----|-----------------------------------------------------------------------------------------------------------------------------------|
| #5  | biochemical (Topic) and marker (Topic)                                                                                            |
| #6  | laboratory (Topic) and marker (Topic)                                                                                             |
| #7  | #2 OR #3 OR #4 OR #5 OR #6                                                                                                        |
| #8  | diagnosis (Topic) or diagnoses (Topic) or diagnose (Topic) or diagnostic (Topic) or diagnostics (Topic) or diagnostically (Topic) |
| #9  | differentiate (Topic) or differentiation (Topic) or differentiating (Topic) or differentiability (Topic)                          |
| #10 | #8 OR #9                                                                                                                          |
| #11 | Stroke (Topic)                                                                                                                    |
| #12 | cerebrovascular (Topic) and accident (Topic)                                                                                      |
| #13 | brain (Topic) and vascular (Topic) and accident (Topic)                                                                           |
| #14 | brain (Topic) and infarction (Topic)                                                                                              |
| #15 | brain (Topic) and infarct (Topic)                                                                                                 |
| #16 | cerebral (Topic) and hemorrhage (Topic)                                                                                           |
| #17 | intracerebral (Topic) and hemorrhage (Topic)                                                                                      |
| #18 | #11 OR #12 OR #13 OR #14 OR #15 OR #16 OR #17                                                                                     |
| #19 | #1 AND #7 AND #10 AND #18                                                                                                         |

**Supplementary Table 2: Concise characteristics of 182 included studies**

| Study ID                  | Country        | Design             | Comparison                                                  | Setting              | Reference  | Specimen              | Sampling time | Omics                 | Biomarkers                                                                                                                                                                                                                                                                             |
|---------------------------|----------------|--------------------|-------------------------------------------------------------|----------------------|------------|-----------------------|---------------|-----------------------|----------------------------------------------------------------------------------------------------------------------------------------------------------------------------------------------------------------------------------------------------------------------------------------|
| Zhou 2021 (1)             | China          | Case control study | IS vs. Controls                                             | Not stated           | CT; MRI    | serum                 | 24h           | transcripts           | miR-124                                                                                                                                                                                                                                                                                |
| Zhang 2022 (2)            | China          | Case control study | IS vs. Controls                                             | Not stated           | Not stated | serum                 | 9h            | proteins              | JKAP                                                                                                                                                                                                                                                                                   |
| Yang 2022 (3)             | China          | Case control study | IS vs. Controls                                             | Not stated           | Not stated | plasma; exosome       | 12h           | Transcriptomics       | circ_0112036, circ_0066867, circ_0093708, circ_0041685                                                                                                                                                                                                                                 |
| Turek-Jakubowska 2022 (4) | Poland         | Case control study | IS vs. Controls                                             | Neurology ward       | CT         | plasma                | 24h           | Proteomics            | Alpha-1B-glycoprotein                                                                                                                                                                                                                                                                  |
| Tian 2022 (5)             | China          | Case control study | IS vs. Controls                                             | Neurovascular centre | Not stated | whole blood           | 6h            | Transcriptomics       | lncRNA NR_120420                                                                                                                                                                                                                                                                       |
| Rahmati 2021 (6)          | Iran           | Case control study | IS vs. Controls                                             | Not stated           | MRI        | serum                 | 24h           | transcripts; proteins | miR-210, HIF-1a                                                                                                                                                                                                                                                                        |
| Li 2021 (7)               | China          | Case control study | IS vs. Controls                                             | Not stated           | CT; MRI    | serum                 | 24h           | proteins; metabolites | uric acid, CRP, NT-proBNP                                                                                                                                                                                                                                                              |
| Induruwa 2022 (8)         | UK             | Prospective study  | IS vs. Controls; HS vs. Controls; Total stroke vs. controls | ED                   | Not stated | whole blood; platelet | 8h            | proteins; platelet    | IS vs. control: GPVI-dimer, HS vs. control: GPVI-dimer, total stroke vs. control: GPVI, GPVI-dimer, platelet P-selectin                                                                                                                                                                |
| Gawryś 2022 (9)           | Poland         | Case control study | IS vs. Controls                                             | Neurology ward       | CT         | platelet              | 24h           | Proteomics; platelet  | Beta-amyloid protein A4, Amyloid-like protein 2, coactosin-like protein, thymidine phosphorylase 4 (TYMP-4), interferon regulatory factor 7 (IRF7), vitamin K-dependent protein S, histone proteins (H2A type 1 and 1-A, H2A types 2B and J, H2Av, -z, and -x), platelet basic protein |
| Cho 2022 (10)             | not stated     | Case control study | IS vs. Controls                                             | ED                   | Not stated | PBMCs                 | 24h           | PBMC number           | NK cells, CD14+ monocytes                                                                                                                                                                                                                                                              |
| Intiso 2004 (11)          | Italy          | Prospective study  | IS vs. Controls                                             | Neurology ward       | CT; MRI    | serum                 | 24h           | proteins              | TNFa                                                                                                                                                                                                                                                                                   |
| Perini 2001 (12)          | Italy          | Prospective study  | IS vs. Controls                                             | Stroke Unit          | CT         | serum                 | 12h           | proteins              | IL-6, IL-10                                                                                                                                                                                                                                                                            |
| Pedersen 2004 (13)        | Norway         | Case control study | IS vs. Controls                                             | Not stated           | CT; MRI    | plasma                | 24h           | proteins              | CRP                                                                                                                                                                                                                                                                                    |
| Nayak 2011 (14)           | India          | Case control study | IS vs. Controls                                             | Not stated           | CT         | serum                 | 24h           | proteins              | IMA                                                                                                                                                                                                                                                                                    |
| Senes 2007 (15)           | Turkey         | Prospective study  | IS vs. Controls                                             | Not stated           | Not stated | serum                 | 24h           | metabolites           | nitrite, nitrate, IMA, TBARS                                                                                                                                                                                                                                                           |
| Feng 2019 (16)            | China          | Case control study | IS vs. Controls                                             | Not stated           | CT; MRI    | plasma                | 24h           | transcripts           | lncRNA ANRIL                                                                                                                                                                                                                                                                           |
| Blann 1999 (17)           | UK             | Prospective study  | IS vs. Controls                                             | Not stated           | Not stated | serum; plasma         | 12h           | proteins              | ICAM-1, E-selectin, VCAM-1, vWF                                                                                                                                                                                                                                                        |
| Shyu 1997 (18)            | China (Taiwan) | Prospective study  | IS vs. Controls                                             | ED                   | CT         | serum                 | 24h           | proteins              | ICAM-1, E-selectin                                                                                                                                                                                                                                                                     |

|                      |          |                                            |                                 |                                    |            |                                      |                               |                        |                                                                                                                                                                                                                                              |
|----------------------|----------|--------------------------------------------|---------------------------------|------------------------------------|------------|--------------------------------------|-------------------------------|------------------------|----------------------------------------------------------------------------------------------------------------------------------------------------------------------------------------------------------------------------------------------|
| Liu 2015 (19)        | China    | Prospective study                          | IS vs. Controls                 | Not stated                         | CT; MRI    | serum                                | 24h                           | proteins               | CXCL12                                                                                                                                                                                                                                       |
| Supanc 2011 (20)     | Croatia  | Prospective study                          | IS vs. Controls                 | Neurology ward                     | CT         | serum                                | 24h                           | proteins               | ICAM-1, VCAM-1                                                                                                                                                                                                                               |
| Wunderlich 2005 (21) | Germany  | Prospective study                          | IS vs. Controls                 | Neurology ward                     | CT         | serum                                | 24h; 18h; 12h; 6h; 3h; 2h; 1h | proteins               | B-FABP, H-FABP                                                                                                                                                                                                                               |
| Hu 2016 (22)         | China    | Case control study                         | IS vs. HS                       | Not stated                         | Not stated | whole blood                          | 12h                           | metabolites            | Asn, C5:1, Arg/Om, Val/Phe, (C0 +C2 + C3 + C16 + C18:1)/Cit                                                                                                                                                                                  |
| Uno 2003 (23)        | Japan    | Prospective study                          | IS vs. Controls                 | department of neurological surgery | CT; MRI    | plasma                               | 24h                           | proteins               | OxLDL                                                                                                                                                                                                                                        |
| Sun 2019 (24)        | Germany  | Prospective study                          | IS vs. Controls                 | ED                                 | CT; MRI    | serum                                | 24h                           | Metabolomics           | tetradecanedioate, hexadecanedioate                                                                                                                                                                                                          |
| Song 2006 (25)       | Korea    | Prospective study                          | IS vs. Controls                 | Not stated                         | CT; MRI    | plasma                               | 24h                           | proteins               | IL-6,PAI-1,PAP                                                                                                                                                                                                                               |
| Zitnanova 2016 (26)  | Slovakia | Case control study                         | IS vs. Controls                 | Neurology ward                     | CT         | plasma                               | 24h                           | proteins               | lipid peroxides, superoxide dismutase activity, catalase activity, paraoxonase activity, glutathione peroxide activity                                                                                                                       |
| Can 2015 (27)        | Turkey   | Prospective study                          | IS vs. Controls                 | ED                                 | MRI        | serum                                | 12h                           | proteins               | MBP, IMA                                                                                                                                                                                                                                     |
| Kimberly 2013 (28)   | USA      | Prospective study +animal experiment study | IS vs. Controls                 | ED                                 | MRI        | plasma                               | 2h; 9h                        | Metabolomics; targeted | BCAA (leucine, isoleucine, valine), carnitine, threonine, histidine, glucose, methionine, glycine, proline, lysine, cysteamine, uridine, 5'-adenosylhomocysteine, creatinine, N-carbamoyl-beta-alanine, cis/trans hydroxyproline, asparagine |
| Abboud 2007 (29)     | France   | Prospective study                          | IS vs. HS; Total stroke vs. TIA | ED                                 | CT; MRI    | serum                                | 3h                            | proteins               | IMA                                                                                                                                                                                                                                          |
| Tang 2006 (30)       | USA      | Case control study                         | IS vs. Controls                 | Not stated                         | CT         | whole blood                          | 24h; 5h; 3h                   | Genomics               | Hox 1.11 gene, CKAP4 gene, S100A9 gene, MMP9 gene, S100P gene, F5 gene, FPR1 gene, S100A12 gene, RNASE2 gene, ARG1 gene, CA4 gene, LY96 gene, SLC16A6 gene, HIST2H2AA gene, ets-2 gene, BCL6 gene, PYGL gene, NPL gene                       |
| Rainer 2007 (31)     | China    | Prospective study                          | IS vs. HS                       | ED                                 | CT; MRI    | plasma                               | 24h                           | proteins; cfDNA        | cfDNA, S100                                                                                                                                                                                                                                  |
| Tiedt 2018 (32)      | Germany  | Prospective study                          | IS vs. Controls                 | ED                                 | MRI        | serum                                | 24h                           | proteins               | NfL                                                                                                                                                                                                                                          |
| Zhu 2019 (33)        | China    | Case control study                         | IS vs. Controls                 | Not stated                         | CT; MRI    | PBMC                                 | 24h                           | transcripts            | PBMC circ-DLGAP4                                                                                                                                                                                                                             |
| Zhu 2018 (34)        | China    | Case control study                         | IS vs. Controls                 | Not stated                         | MRI        | leukocytes                           | 24h                           | transcripts            | lncRNA MIAT                                                                                                                                                                                                                                  |
| Zhou 2016 (35)       | China    | Prospective study                          | IS vs. HS                       | ED                                 | CT         | plasma                               | 6h                            | proteins               | S100B                                                                                                                                                                                                                                        |
| Zhou 2018 (36)       | China    | Case control study                         | IS vs. Controls                 | Not stated                         | MRI        | serum; exosome                       | 24h                           | transcripts            | miR-134                                                                                                                                                                                                                                      |
| Zhou 2022 (37)       | China    | Case control +animal study                 | IS vs. Controls                 | Neurology department               | CT; MRI    | Serum (small extracellular vesicles) | 24h                           | Transcriptomics        | miR-9-3p, miR-124-3p, miR-143-3p, miR-93-5p                                                                                                                                                                                                  |

|                    |        |                                              |                                             |                          |            |                                   |     |                                        |                                                                                                                                                                                                                                                                                                                       |
|--------------------|--------|----------------------------------------------|---------------------------------------------|--------------------------|------------|-----------------------------------|-----|----------------------------------------|-----------------------------------------------------------------------------------------------------------------------------------------------------------------------------------------------------------------------------------------------------------------------------------------------------------------------|
| Zhao 2016 (38)     | China  | Prospective study                            | IS vs. Controls                             | Neurology ward           | Not stated | serum                             | 24h | proteins                               | Apolipoprotein A1-Unique Peptide (APOA1-UP)                                                                                                                                                                                                                                                                           |
| Zhao 2017 (39)     | China  | Case control study                           | IS vs. Controls; HS vs. Controls            | ED, neurology department | CT; MRI    | plasma; neutrophils, lymphocytes  | 6h  | transcripts                            | miR-99a-5p                                                                                                                                                                                                                                                                                                            |
| Zhao 2016 (40)     | China  | Prospective study                            | IS vs. Controls                             | Neurology ward           | MRI        | plasma                            | 24h | transcripts                            | miR-335                                                                                                                                                                                                                                                                                                               |
| Zhang 2017 (41)    | China  | Case control study                           | IS vs. HS; IS vs. Controls; HS vs. Controls | Not stated               | CT; MRI    | dried blood spot                  | 12h | Metabolomics                           | IS vs. control: C22, C5, C3DC, C4, C5DC/C5-OH, C3DC/C10, C14:2, C10:2, (0+2+3+16+18:1)/Cit, Arg, Pro HS vs. control: C16-OH/C16, C16:1-OH, C10, C5/C3, C12, C18, C18:1, C4DC, Val/Phe, C16, Arg, Thr IS vs. HS: C4-OH, C5DC, C14, C16-OH, Tyr/Cit, Val/Phe, C5DC/C5-OH, C5DC/C16, C18-OH, (0+2+3016+18:1)/Cit, C3/Met |
| Zhang 2020 (42)    | China  | Prospective study                            | IS vs. Controls                             | Not stated               | CT; MRI    | plasma; endothelial microvesicles | 24h | transcripts; endothelial microvesicles | EMVs, EMVs-miR-155                                                                                                                                                                                                                                                                                                    |
| Zaremba 2006 (43)  | Poland | Case control study                           | IS vs. Controls                             | Not stated               | CT         | serum                             | 24h | proteins                               | IL-12                                                                                                                                                                                                                                                                                                                 |
| Yuan 2020 (44)     | China  | Case control study + animal experiment study | IS vs. Controls                             | Neurology ward           | CT; MRI    | plasma                            | 24h | proteins                               | GMFB                                                                                                                                                                                                                                                                                                                  |
| Yigit 2017 (45)    | Turkey | Case control study                           | IS vs. Controls; HS vs. Controls            | ED                       | Not stated | serum                             | 24h | proteins                               | UCH-L1                                                                                                                                                                                                                                                                                                                |
| Yang 2016 (46)     | China  | Case control study                           | IS vs. Controls                             | Not stated               | CT; MRI    | plasma                            | 24h | transcripts                            | miR-107, miR-128b, miR-153                                                                                                                                                                                                                                                                                            |
| Xiong 2015 (47)    | China  | Prospective study                            | IS vs. HS                                   | Not stated               | CT; MRI    | serum                             | 6h  | proteins                               | GFAP                                                                                                                                                                                                                                                                                                                  |
| Wu 2020 (48)       | China  | Case control study                           | IS vs. Controls                             | Neurology ward           | CT; MRI    | plasma                            | 6h  | transcripts                            | miR-99b                                                                                                                                                                                                                                                                                                               |
| Williams 2007 (49) | USA    | Prospective study                            | IS vs. SM                                   | ED                       | MRI        | plasma                            | 24h | Endothelial microparticles (EMPs)      | number of Endothelial microparticles                                                                                                                                                                                                                                                                                  |
| Wang 2017 (50)     | China  | Case control study                           | IS vs. Controls                             | ED                       | CT; MRI    | serum                             | 6h  | transcripts                            | miR-221-3p, miR-382-5p                                                                                                                                                                                                                                                                                                |
| Wang 2014 (51)     | China  | Prospective study                            | IS vs. Controls                             | Not stated               | MRI        | plasma                            | 24h | transcripts                            | miR-106b-5P, miR-4306, miR-320e, miR-320d                                                                                                                                                                                                                                                                             |
| Wang 2018 (52)     | China  | Case control study                           | IS vs. Controls                             | Neurology ward           | CT; MRI    | plasma; exosome                   | 6h  | transcripts                            | miR-21-5p, miR-30a-5p                                                                                                                                                                                                                                                                                                 |
| Wang 2017 (53)     | China  | Case control study + animal experiment study | IS vs. Controls                             | Not stated               | MRI        | plasma; lymphocytes               | 3h  | transcripts                            | lncRNA H19                                                                                                                                                                                                                                                                                                            |
| Walsh 2016 (54)    | USA    | Case control study                           | IS vs. HS; IS vs. Controls; HS vs. Controls | ED, neurology department | Not stated | plasma                            | 12h | proteins                               | Apo A-I, Apo C-I, Apo C-III, MMP-3, MMP-9, paraoxonase-1                                                                                                                                                                                                                                                              |



|                     |                |                             |                                             |                                |            |             |             |                             |                                                                                                                                                                                                                                                                                                                                                                                                                                                                                                                                                                                                                                                                                         |
|---------------------|----------------|-----------------------------|---------------------------------------------|--------------------------------|------------|-------------|-------------|-----------------------------|-----------------------------------------------------------------------------------------------------------------------------------------------------------------------------------------------------------------------------------------------------------------------------------------------------------------------------------------------------------------------------------------------------------------------------------------------------------------------------------------------------------------------------------------------------------------------------------------------------------------------------------------------------------------------------------------|
|                     |                |                             |                                             | ent,<br>NICU                   |            |             |             |                             |                                                                                                                                                                                                                                                                                                                                                                                                                                                                                                                                                                                                                                                                                         |
| Vukasovic 2006 (55) | Croatia        | Case control study          | IS vs. Controls                             | Not stated                     | CT         | serum       | 24h         | proteins                    | MMP-2, TIMP-2                                                                                                                                                                                                                                                                                                                                                                                                                                                                                                                                                                                                                                                                           |
| von Recum 2015 (56) | Germany        | Prospective study           | IS vs. TIA                                  | ED                             | Not stated | serum       | 4.5h        | proteins                    | copeptin                                                                                                                                                                                                                                                                                                                                                                                                                                                                                                                                                                                                                                                                                |
| Unden 2009 (57)     | Sweden         | Prospective study           | IS vs. HS                                   | Not stated                     | CT         | not stated  | 24h         | proteins                    | S100B, NSE, GFAP, APC-PCI                                                                                                                                                                                                                                                                                                                                                                                                                                                                                                                                                                                                                                                               |
| Tunç 2018 (58)      | Turkey         | Prospective study           | IS vs. Controls                             | Not stated                     | CT; MRI    | serum       | 24h         | proteins                    | SPA                                                                                                                                                                                                                                                                                                                                                                                                                                                                                                                                                                                                                                                                                     |
| Tiedt 2017 (59)     | Germany        | Prospective study           | IS vs. TIA; IS vs. Controls                 | ED                             | CT; MRI    | plasma      | 24h         | Transcriptomics             | miR-125a-5p, miR-125b-5p, miR-143-3p                                                                                                                                                                                                                                                                                                                                                                                                                                                                                                                                                                                                                                                    |
| Tiedt 2020 (60)     | Germany        | Prospective study           | IS vs. SM; IS vs. Controls                  | ED                             | CT; MRI    | serum       | 24h         | Metabolomics                | asymmetrical dimethylarginine (ADMA), symmetrical dimethylarginine (SDMA), pregnenolone sulphate, adenosine                                                                                                                                                                                                                                                                                                                                                                                                                                                                                                                                                                             |
| Tian 2015 (61)      | China          | Prospective study           | IS vs. Controls                             | Not stated                     | CT; MRI    | serum       | 24h         | proteins                    | PCT, hsCRP, HCY                                                                                                                                                                                                                                                                                                                                                                                                                                                                                                                                                                                                                                                                         |
| Tian 2016 (62)      | China          | Prospective study           | IS vs. Controls                             | Cerebrovascular Disease Centre | Not stated | plasma      | 6h          | Transcriptomics             | miR-16                                                                                                                                                                                                                                                                                                                                                                                                                                                                                                                                                                                                                                                                                  |
| Taema 2014 (63)     | Egypt          | Prospective study           | IS vs. HS                                   | Not stated                     | CT         | serum       | 24h         | proteins                    | CRP                                                                                                                                                                                                                                                                                                                                                                                                                                                                                                                                                                                                                                                                                     |
| Stejskal 2011 (64)  | Czech Republic | Case control study          | IS vs. Controls                             | Not stated                     | CT; MRI    | serum       | 3h          | proteins                    | VILIP-1                                                                                                                                                                                                                                                                                                                                                                                                                                                                                                                                                                                                                                                                                 |
| Stanca 2015 (65)    | Romania        | Prospective study           | IS vs. HS                                   | ED                             | CT         | serum       | 24h; 12h    | proteins                    | GFAP, antibodies against NMDA receptor subunit NR2                                                                                                                                                                                                                                                                                                                                                                                                                                                                                                                                                                                                                                      |
| Stamova 2010 (66)   | USA            | Case control study          | IS vs. Controls                             | Not stated                     | Not stated | whole blood | 24h; 5h; 3h | Genomics                    | GENES (ABCA1, PGM5, CCDC144C /// LOC100134159, LECT2, SHOX, TBX5, SPTLC3, SNIP, RBMS3, P704P, THSD4, FAT3, SNRPN, GLYATL1, GADL1, DKFZP434L187, CXADR, OVOL2, RNF141, CLEC4E, ELL2, SPIB, BXDC5, UNC5B, TIMP2, ASTN2, FLJ35934, ANKRD28, CCDC144A, TIMM8A, ALDOAP2, LDB3, PTPRD, LOC729222 ///PPFIBP1, CCRL1, HNRNPUL2, FCRL4, ELAVL2, PRTG, DLX6, FOXA2, SCD5, GABRB2, GYPA, OSBPL1A, PHTF1, CKLF, CKLF, RRAGD, CLEC4E, CKLF, FGD4, CPEB2, LOC100290882, UBXN2B, ENTPD1, BST1,LTB4R,F5,IFRD1,KIAA0319, CHMP1B, MCTP1, VNN3, AMN1, LAMP2, FCHO2, ZNF608, REM2, QKI, RBM25, FAR2, ST3GAL6, HNRNPH2, GAB1, UBR5,VAPA,THBD,LOC283027, LOC344595,RPL22, LOC100129488, RPL22, MCTP1, SH3GL3) |
| Stamova 2019 (67)   | USA            | Case control study          | IS vs. HS; IS vs. Controls; HS vs. Controls | Not stated                     | CT; MRI    | not stated  | 24h         | Transcriptomics             | HS vs. control: 489 transcripts; IS vs. control: 396 transcripts; IS vs. HS: 256 transcripts                                                                                                                                                                                                                                                                                                                                                                                                                                                                                                                                                                                            |
| Song 2019 (68)      | USA            | Case control study          | IS vs. Controls                             | Not stated                     | CT; MRI    | serum       | 24h         | Proteomics                  | clusterin, cystatin C (CST3)                                                                                                                                                                                                                                                                                                                                                                                                                                                                                                                                                                                                                                                            |
| Simats 2020 (69)    | Spain          | Case control study + animal | IS vs. SM                                   | ED                             | Not stated | plasma      | 6h          | Transcriptomics; Proteomics | CTNND2                                                                                                                                                                                                                                                                                                                                                                                                                                                                                                                                                                                                                                                                                  |

|                        |           |                                             |                                                                                                |                          |            |             |                  |                       |                                                                                                       |
|------------------------|-----------|---------------------------------------------|------------------------------------------------------------------------------------------------|--------------------------|------------|-------------|------------------|-----------------------|-------------------------------------------------------------------------------------------------------|
|                        |           | experiment study                            |                                                                                                |                          |            |             |                  |                       |                                                                                                       |
| Simats 2018 (70)       | Spain     | Case control study+ animal experiment study | IS vs. Controls                                                                                | Not stated               | Not stated | plasma      | 6h               | Proteomics; proteins  | CKB, CMPK                                                                                             |
| Simats 2018 (71)       | Spain     | Prospective study + animal experiment study | IS vs. Controls                                                                                | ED                       | Not stated | serum       | 6h; 4.5h         | proteins              | CCL23, CCL9                                                                                           |
| Sharma 2014 (72)       | USA       | Prospective study                           | IS vs. HS; IS vs. SM; Total stroke vs. SM                                                      | ED                       | CT; MRI    | plasma      | 24h              | proteins              | eotaxin, epidermal growth factor receptor, S100A12, metalloproteinase inhibitor-4 (TIMP-4), prolactin |
| Sharma 2015 (73)       | India     | Case control study                          | IS vs. Controls                                                                                | Not stated               | CT; MRI    | serum       | 24h              | Proteomics            | vWF, ADAMTS13, S100A7                                                                                 |
| Shaker 2020 (74)       | Iraq      | Case control study                          | IS vs. Controls                                                                                | Not stated               | CT         | plasma      | 24h              | proteins              | GPBB                                                                                                  |
| Sepramaniam 2014 (75)  | Singapore | Prospective study+ animal experiment study  | IS vs. Controls                                                                                | Not stated               | CT; MRI    | whole blood | 24h              | Transcriptomics       | miR-125b-2*, miR-27a*, miR-422a, miR-488, miR-627                                                     |
| Sayan 2016 (76)        | Turkey    | Prospective study                           | IS vs. Controls                                                                                | Neurology ward           | CT         | plasma      | 24h              | proteins              | BNP                                                                                                   |
| Rozanski 2017 (77)     | Germany   | Prospective study                           | IS vs. HS                                                                                      | Stroke Emergency Mobile  | CT         | plasma      | 3h; 1h           | proteins              | GFAP                                                                                                  |
| Roudbary 2011 (78)     | Iran      | Cross sectional study                       | IS vs. HS                                                                                      | Neurology ward           | CT         | serum       | 24h              | proteins              | hsCRP                                                                                                 |
| Rico Santana 2014 (79) | Spain     | Case control study                          | IS vs. Controls                                                                                | ED, neurology department | CT; MRI    | serum       | 6h               | Proteomics            | 2155-Da peptide                                                                                       |
| Richard 2016 (80)      | France    | Case control study                          | IS vs. Controls                                                                                | Not stated               | CT; MRI    | plasma      | 24h; 6h; 3h      | proteins              | PRDX1                                                                                                 |
| Reynolds 2003 (81)     | USA       | Case control study                          | IS vs. HS; IS vs. TIA; IS vs. Controls; HS vs. TIA; HS vs. Controls; Total stroke vs. controls | ED                       | CT; MRI    | serum       | 24h; 12h; 6h; 3h | proteins              | S100B, BNGF, vWF, MMP9, MCP-1                                                                         |
| Ren 2016 (82)          | China     | Case control study                          | IS vs. HS; IS vs. Controls; HS vs. Controls                                                    | ED                       | CT; MRI    | serum       | 24h; 4.5h        | proteins              | UCH-L1, GFAP                                                                                          |
| Ranga 2016 (83)        | India     | Cross sectional study                       | IS vs. Controls                                                                                | Not stated               | CT; MRI    | serum       | 24h              | proteins              | CEA                                                                                                   |
| Rahmati 2020 (84)      | Iran      | Case control study                          | IS vs. Controls                                                                                | Neurology ward           | CT; MRI    | serum       | 12h              | transcripts; proteins | S100B, miR-602                                                                                        |

|                     |          |                       |                                                      |                |            |                                           |            |                        |                                                                                                                                                                                                                                                                                                                                                                                                                                                                                                                                                                                                                                                                                                                                                                                                                                                                                             |
|---------------------|----------|-----------------------|------------------------------------------------------|----------------|------------|-------------------------------------------|------------|------------------------|---------------------------------------------------------------------------------------------------------------------------------------------------------------------------------------------------------------------------------------------------------------------------------------------------------------------------------------------------------------------------------------------------------------------------------------------------------------------------------------------------------------------------------------------------------------------------------------------------------------------------------------------------------------------------------------------------------------------------------------------------------------------------------------------------------------------------------------------------------------------------------------------|
| Qi 2021 (85)        | China    | Case control study    | IS vs. Controls                                      | Not stated     | CT; MRI    | serum; extracellular vesicle (EV)-derived | 6h         | transcripts            | miR-124-3p                                                                                                                                                                                                                                                                                                                                                                                                                                                                                                                                                                                                                                                                                                                                                                                                                                                                                  |
| Paycheva 2021 (86)  | Bulgaria | Cross-sectional study | IS vs. Controls                                      | Neurology ward | CT         | serum                                     | 24h        | proteins               | fibrinogen                                                                                                                                                                                                                                                                                                                                                                                                                                                                                                                                                                                                                                                                                                                                                                                                                                                                                  |
| Perovic 2017 (87)   | Croatia  | Case control study    | IS vs. Controls                                      | Neurology ward | CT         | serum                                     | 24h        | proteins               | resistin, copeptin                                                                                                                                                                                                                                                                                                                                                                                                                                                                                                                                                                                                                                                                                                                                                                                                                                                                          |
| Penn 2018 (88)      | Canada   | Prospective study     | IS vs. Controls                                      | ED             | CT; MRI    | plasma                                    | 24h        | Proteomics             | E-selectin, Apolipoprotein C-I, Calponin, Coagulation factor XII, Clusterin, CRP, IGF-1, Complement component 4b (C4b and C4a), Serum paraoxonase/aryl esterase 1 (Paraoxonase- PON1), Prothrombin/thrombin, Plasminogen/plasmin/angiostatin, Vitamin K-dependent protein S (Protein S), Serum paraoxonase/lactonase 3 (Paraoxonase- PON3), Vitamin K-dependent protein C (Protein C), Antithrombin III, Vitamin K-dependent protein Z (Protein Z), Coagulation factor V, Apolipoprotein D, Coagulation factor XI, Insulin-like growth factor-binding protein 3 (IBP 3), L-selectin, Plasma protease C1 inhibitor (C1 inhibitor), Plasma serine protease inhibitor (Protein C inhibitor), IL-6, S100A12, Fatty acid binding protein 3 (FABP3), Guanylate cyclase A(NPR1) (ANPR1), Epidermal growth factor receptor (EGFR), Platelet endothelial cell adhesion molecule (PECAM 1), Prolactin |
| Park 2013 (89)      | Korea    | Prospective study     | IS vs. SM                                            | Not stated     | CT; MRI    | plasma                                    | 24h        | proteins               | H-FABP, S100B                                                                                                                                                                                                                                                                                                                                                                                                                                                                                                                                                                                                                                                                                                                                                                                                                                                                               |
| Park 2018 (90)      | USA      | Prospective study     | IS vs. Controls                                      | Not stated     | CT; MRI    | plasma                                    | 12h        | proteins               | GPBB                                                                                                                                                                                                                                                                                                                                                                                                                                                                                                                                                                                                                                                                                                                                                                                                                                                                                        |
| Pan 2020 (91)       | China    | Case control study    | IS vs. Controls                                      | Not stated     | Not stated | platelet                                  | 7.5h       | Genomics               | EGR2 gene                                                                                                                                                                                                                                                                                                                                                                                                                                                                                                                                                                                                                                                                                                                                                                                                                                                                                   |
| Palm 2018 (92)      | Germany  | Case control study    | IS vs. Controls                                      | Not stated     | CT; MRI    | serum                                     | 24h        | proteins               | MMP-8, MPO, TIMP-1                                                                                                                                                                                                                                                                                                                                                                                                                                                                                                                                                                                                                                                                                                                                                                                                                                                                          |
| Oraby 2019 (93)     | Egypt    | Case control study    | IS vs. Controls                                      | Neurology ward | CT; MRI    | serum                                     | 24h        | proteins               | thioredoxin                                                                                                                                                                                                                                                                                                                                                                                                                                                                                                                                                                                                                                                                                                                                                                                                                                                                                 |
| O'Connell 2019 (94) | USA      | Case control study    | IS vs. SM                                            | ED             | CT; MRI    | whole blood                               | 24h        | genes; leukocyte count | PLXDC2 gene, STK3 gene, ANTXR2 gene, KIF1B gene, CD163 gene, PDK4 gene, CTSZ gene, GRAP gene, MAL gene, ID3 gene                                                                                                                                                                                                                                                                                                                                                                                                                                                                                                                                                                                                                                                                                                                                                                            |
| O'Connell 2019 (95) | USA      | Case control study    | IS vs. HS; Total stroke vs. SM ; Other: HS vs. IS+SM | ED             | CT; MRI    | whole blood                               | 12h        | Proteomics             | NVAVAQDENLAG, NNYWANVASGLG, QSLKPKGVALSG, GASVHDGVALSG, GEYFRWNWDSVA,APFGQKDVALGL, GDRRPLGVALSG,KGQRGYHLKHDA, AEQREFNKHLSA,PEFRELSKHDVA, PKPHGFPGQEYV,KPEKLNGLVALSG, NSLKENGVALSG,VLGPRHEPDSGA, EKLYYHDSQEKH,AWQKSGVALSG, QRPDPKDGQAKD                                                                                                                                                                                                                                                                                                                                                                                                                                                                                                                                                                                                                                                      |
| O'Connell 2016 (96) | USA      | Case control study    | IS vs. SM; IS vs. Controls                           | ED             | MRI        | whole blood                               | 4.5h; 5.3h | Genomics               | ANTXR2 gene, STK3 gene, PDK4 gene, CD163 gene, MAL gene, GRAP gene, ID3 gene, CTSZ gene, KIF1B gene, PLXDC2 gene                                                                                                                                                                                                                                                                                                                                                                                                                                                                                                                                                                                                                                                                                                                                                                            |
| O'Connell 2017 (97) | USA      | Case control study    | IS vs. SM                                            | ED             | CT; MRI    | plasma                                    | 4.5h       | cell free DNA          | cfDNA                                                                                                                                                                                                                                                                                                                                                                                                                                                                                                                                                                                                                                                                                                                                                                                                                                                                                       |

|                      |                |                       |                                                  |                           |            |             |             |                          |                                                                                                                                                                                                                                                                                                                                                                                                          |
|----------------------|----------------|-----------------------|--------------------------------------------------|---------------------------|------------|-------------|-------------|--------------------------|----------------------------------------------------------------------------------------------------------------------------------------------------------------------------------------------------------------------------------------------------------------------------------------------------------------------------------------------------------------------------------------------------------|
| O'Connell 2017 (98)  | USA            | Case control study    | IS vs. Controls                                  | public platform           | Not stated | whole blood | 24h; 5h; 3h | genes                    | ANTXR2 gene, STK3 gene, PDK4 gene, CD163 gene, MAL gene, GRAP gene, ID3 gene, CTSZ gene, KIF1B gene, PLXDC2 gene                                                                                                                                                                                                                                                                                         |
| O'Connell 2020 (99)  | USA            | Case control study    | IS vs. Controls                                  | ED                        | CT; MRI    | plasma      | 24h         | proteins                 | NfL, Tau                                                                                                                                                                                                                                                                                                                                                                                                 |
| Nielsen 2020 (100)   | Denmark        | Prospective study     | IS vs. TIA; IS vs. Controls                      | Neurology ward            | CT; MRI    | plasma      | 8h          | proteins                 | NfL, VEGF-A, VCAM-1, ICAM-1, IL-6, S100B, E-selectin                                                                                                                                                                                                                                                                                                                                                     |
| Nguyen 2020 (101)    | Netherland     | Prospective study     | IS vs. HS; IS vs. SM; IS vs. Controls; HS vs. SM | ED                        | CT         | plasma      | 6h          | Transcriptomics          | tRNA-TyrGTA, tRNA-ThrCGT, tRNA-ValCAC                                                                                                                                                                                                                                                                                                                                                                    |
| Nahan 2017 (102)     | USA            | Case control study    | IS vs. HS; IS vs. Controls; HS vs. Controls      | ED                        | Not stated | plasma      | 12h         | Proteomics               | IS vs. control (As, Co, Fe, Li, Sr, U, Se, Cd), HS vs. control (Ag, Al, As, Co, Ni, U, Zn, Fe, Sr, Cd, Pb, Se); HS vs. IS (Ag, Co, Fe, Al, As, Li, Ni, U, W), IS special markers (calpain-15, titin Isoform 3, tropomyosin alpha-4 chain); HS special markers (bestrophin-3, GIRK-1, TTBK1, CAB3)                                                                                                        |
| Montaner 2012 (103)  | Spain          | Prospective study     | IS vs. HS                                        | ED                        | CT         | plasma      | 6h          | proteins                 | S100B, sRAGE                                                                                                                                                                                                                                                                                                                                                                                             |
| Menon 2018 (104)     | India          | Prospective study     | IS vs. Controls                                  | Not stated                | Not stated | serum       | 24h; 1h     | proteins                 | IMA                                                                                                                                                                                                                                                                                                                                                                                                      |
| Mattila 2021 (105)   | Finland        | Prospective study     | IS vs. HS                                        | ED                        | Not stated | plasma      | 3h; 1h      | proteins                 | GFAP                                                                                                                                                                                                                                                                                                                                                                                                     |
| Matsuo 2013 (106)    | Japan          | Prospective study     | IS vs. Controls                                  | Not stated                | CT; MRI    | plasma      | 24h         | proteins                 | VEGF                                                                                                                                                                                                                                                                                                                                                                                                     |
| Matsumori 2002 (107) | Japan          | Case control study    | IS vs. Controls                                  | Not stated                | CT         | serum       | 24h         | proteins                 | HGF                                                                                                                                                                                                                                                                                                                                                                                                      |
| Maly 2021 (108)      | Czech Republic | Cross-sectional study | IS vs. Controls                                  | Not stated                | Not stated | plasma      | 4.5h        | Metabolomics; lipidomics | FA (20:2), FA (20:3), FA (20:4), FA (20:5), FA (22:4), FA (22:5), FA (22:6), FA (16:1), FA (17:1), AHFA (14:0/16:2), FAHFA (16:1/18:3), FAHFA (18:1/20:3), FAHFA (18:2/20:4), FAHFA (20:4/18:3), LPC (20:5), LPC (22:5), LPC (22:6), LPE (18:2), LPE (20:4), LPE (22:6), LPI (18:1), LPI (18:2), TG (14:0_16:1_20:3), TG (16:0_16:1_18:0), TG (16:0_18:2_18:3), TG (16:0_18:2_22:6), TG (17:1_17:2_19:0) |
| Mahovic 2013 (109)   | Croatia        | Prospective study     | IS vs. Controls                                  | Not stated                | CT         | serum       | 24h         | proteins                 | soluble Fas/APO 1 (sFas/APO 1)                                                                                                                                                                                                                                                                                                                                                                           |
| Ma 2019 (110)        | China          | Case control study    | IS vs. Controls                                  | ED + Neurology department | CT; MRI    | plasma      | 6h          | transcripts              | miR-93                                                                                                                                                                                                                                                                                                                                                                                                   |
| Luger 2017 (111)     | Germany        | Retrospective study   | IS vs. HS; Other: HS vs. IS+SM                   | ED + Neurology department | CT; MRI    | serum       | 6h          | proteins                 | GFAP                                                                                                                                                                                                                                                                                                                                                                                                     |
| Lu 2020 (112)        | China          | Case control study +  | IS vs. Controls                                  | Not stated                | MRI        | whole blood | 24h; 3h     | Transcriptomics          | circ-PHKA2, circ-BBS2                                                                                                                                                                                                                                                                                                                                                                                    |

|                        |            |                                              |                                                      |                |            |                                  |                  |                       |                                                                                                                                                                                                    |
|------------------------|------------|----------------------------------------------|------------------------------------------------------|----------------|------------|----------------------------------|------------------|-----------------------|----------------------------------------------------------------------------------------------------------------------------------------------------------------------------------------------------|
|                        |            | animal experiment study                      |                                                      |                |            |                                  |                  |                       |                                                                                                                                                                                                    |
| Long 2013 (113)        | China      | Cross-sectional study                        | IS vs. Controls                                      | Not stated     | Not stated | plasma                           | 24h              | transcripts           | miR-30a, miR-126, let-7b                                                                                                                                                                           |
| Llombart 2016 (114)    | Spain      | Retrospective study                          | IS vs. HS                                            | ED             | CT         | plasma                           | 6h               | proteins              | RBP4, GFAP                                                                                                                                                                                         |
| Liu 2015 (115)         | China      | Prospective study                            | IS vs. Controls                                      | Neurology ward | MRI        | serum                            | 24h              | transcripts; proteins | miR-124, miR-9, miR-219, MMP9                                                                                                                                                                      |
| Liu 2017 (116)         | China      | Case control study                           | IS vs. Controls                                      | Not stated     | CT; MRI    | serum                            | 9h               | Metabolomics          | serine, isoleucine, betaine, PC (5:0/5:0), LysoPE (18:2)                                                                                                                                           |
| Liu 2020 (117)         | China      | Case control study                           | IS vs. HS; IS vs. Controls                           | Neurology ward | CT; MRI    | serum                            | 24h              | proteins              | Sphingosine 1-phosphate (S1P)                                                                                                                                                                      |
| Liswati 2009 (118)     | Indonesian | Case control study                           | IS vs. HS                                            | Not stated     | CT         | plasma                           | 24h              | proteins              | S100B, MBP                                                                                                                                                                                         |
| Li 2021 (119)          | China      | Case control study                           | IS vs. Controls                                      | Neurology ward | MRI        | serum                            | 24h              | proteins              | Lp-PLA2                                                                                                                                                                                            |
| Li 2015 (120)          | China      | Case control study                           | IS vs. Controls                                      | Not stated     | CT; MRI    | serum                            | 24h              | Transcriptomics       | miR-32-3p, miR-106-5p, miR-532-5p, miR-1246                                                                                                                                                        |
| Li 2018 (121)          | China      | Prospective study                            | IS vs. Controls                                      | ED             | CT; MRI    | plasma; lymphocytes, neutrophils | 6h               | transcripts; proteins | miR-424, TNFa, IGF1                                                                                                                                                                                |
| Leung 2014 (122)       | China      | Prospective study                            | IS vs. HS; IS vs. Controls; HS vs. Controls          | ED             | CT; MRI    | plasma                           | 24h; 6h          | transcripts           | miR-124-3p, miR-16                                                                                                                                                                                 |
| Laterza 2006 (123)     | USA        | Case control study + animal experiment study | IS vs. Controls                                      | Not stated     | Not stated | plasma                           | 24h              | Genomics; proteins    | VLP-1 gene, VLP-1                                                                                                                                                                                  |
| Laskowitz 2009 (124)   | USA        | Prospective study                            | IS vs. HS; Total stroke vs. SM; Total stroke vs. TIA | Not stated     | CT; MRI    | serum                            | 24h; 12h; 6h; 3h | proteins              | MMP9, BNP, D-dimer, S100B                                                                                                                                                                          |
| Kokocinska 2007 (125)  | Poland     | Case control study                           | IS vs. Controls                                      | Neurology ward | CT         | plasma                           | 24h              | proteins              | S100B, Tissue Polypeptide Antigen (TPA)                                                                                                                                                            |
| Kokocinska 2005 (126)  | Poland     | Case control study                           | IS vs. Controls                                      | Neurology ward | CT         | serum                            | 12h              | proteins              | S100B                                                                                                                                                                                              |
| Kodali 2013 (127)      | USA        | Case control study                           | IS vs. HS; IS vs. SM; HS vs. SM                      | ED             | Not stated | plasma                           | 12h              | Proteomics            | Fibrinogen gamma chain, Protein kinase C eta type, Fibrinogen beta chain, Fibrinogen alpha chain, Complement C3, Methylenetetrahydrofolate reductase, Antithrombin-III, Collagen alpha-1(IV) chain |
| Kodali 2012 (128)      | USA        | Case control study                           | IS vs. HS; IS vs. SM; HS vs. SM                      | ED             | Not stated | plasma                           | 12h              | Proteomics            | metalloproteins: Mg, Mn, Cu, Se, Pb, Mo                                                                                                                                                            |
| Kochanowski 2012 (129) | Poland     | Case control study                           | IS vs. Controls                                      | Neurology ward | CT         | plasma                           | 24h              | proteins              | resistin, TNFa                                                                                                                                                                                     |
| Kavalci 2011 (130)     | Turkey     | Prospective study                            | IS vs. HS                                            | ED             | Not stated | serum                            | 24h              | proteins              | BNP, D-dimer, MMP-9, S100B                                                                                                                                                                         |
| Katsanos 2017 (131)    | Greece     | Prospective study                            | IS vs. HS; HS vs. SM; HS vs. Controls                | ED             | Not stated | plasma                           | 6h               | proteins              | GFAP                                                                                                                                                                                               |

|                         |         |                    |                                               |                     |         |                |                  |                                         |                                                                                                                                                                                                                             |
|-------------------------|---------|--------------------|-----------------------------------------------|---------------------|---------|----------------|------------------|-----------------------------------------|-----------------------------------------------------------------------------------------------------------------------------------------------------------------------------------------------------------------------------|
| Kashyap 2009 (132)      | India   | Case control study | IS vs. Controls                               | Neurology ward      | CT      | serum          | 24h              | proteins                                | ITIH4                                                                                                                                                                                                                       |
| Kara 2014 (133)         | Turkey  | Prospective study  | IS vs. Controls                               | ED                  | MRI     | serum          | 24h              | proteins                                | hsCRP, Lp-PLA2                                                                                                                                                                                                              |
| Kalra 2021 (134)        | Germany | Prospective study  | IS vs. HS; HS vs. IS+SM                       | Neurology ward      | CT; MRI | serum          | 12h              | proteins                                | GFAP                                                                                                                                                                                                                        |
| Kalani 2020 (135)       | USA     | Prospective study  | IS vs. HS                                     | ED                  | CT; MRI | plasma         | 24h              | Transcriptomics; extracellular vesicles | miR-150-3p, miR-4286, miR-132-3p, miR-30e-3p, miR-21-3p, miR-27b-3p, miR-342-3p, miR-186-5p, miR-338-3p, miR-5010-5p, miR-134-5p, miR-7c-5p, miR-485-5p                                                                     |
| Jin 2017 (136)          | China   | Case control study | IS vs. Controls                               | Neurology ward      | CT; MRI | plasma         | 24h              | transcripts                             | miR-126, miR-130a, miR-222, miR-218, miR-185                                                                                                                                                                                |
| Jiang 2011 (137)        | China   | Case control study | IS vs. Controls                               | Not stated          | CT; MRI | serum          | 6h               | Metabolomics                            | folic acid, cysteine, S-adenosyl-homocysteine, oxidized glutathione, Tetrahydrofolate, Hydroxy eicosatetraenoic acid, Adenosine, Aldosterone, Hydroxy octadecadienoic acid, Deoxocathasterone, Sucrose 6-phosphate, Betanin |
| Jia 2015 (138)          | China   | Prospective study  | IS vs. Controls                               | Neurology ward      | MRI     | serum          | 24h              | transcripts; proteins                   | miR-145, miR-23a, miR-221, hsCRP, IL-6                                                                                                                                                                                      |
| Ji 2016 (139)           | China   | Case control study | IS vs. Controls                               | Neurology ward      | CT; MRI | serum; exosome | 24h              | transcripts                             | miR-9, miR-124                                                                                                                                                                                                              |
| Inoue 2019 (140)        | Japan   | Prospective study  | IS vs. HS                                     | Not stated          | CT; MRI | serum          | 24h              | proteins                                | LOX-1                                                                                                                                                                                                                       |
| Itumur 2006 (141)       | Turkey  | Case control study | IS vs. Controls                               | NICU                | CT; MRI | plasma         | 24h              | proteins                                | NT-proBNP, troponin I, CK-MB                                                                                                                                                                                                |
| Herisson 2010 (142)     | France  | Prospective study  | IS vs. HS; Total stroke vs. controls          | stroke department   | CT; MRI | serum          | 4.5h             | proteins                                | IMA, HFABP                                                                                                                                                                                                                  |
| Han 2012 (143)          | China   | Case control study | IS vs. Controls; HS vs. Controls              | Not stated          | CT; MRI | serum          | 3h               | proteins                                | IMA                                                                                                                                                                                                                         |
| Gunduz 2008 (144)       | Turkey  | Case control study | IS vs. HS; IS vs. Controls; HS vs. Controls   | ED                  | CT; MRI | serum          | 24h              | proteins                                | IMA                                                                                                                                                                                                                         |
| Gunaydin 2014 (145)     | Turkey  | Prospective study  | IS vs. Controls                               | ED                  | CT; MRI | plasma         | 12h; 6h          | proteins                                | SCUBE1                                                                                                                                                                                                                      |
| Glickman 2011 (146)     | USA     | Prospective study  | IS vs. SM                                     | ED                  | CT      | plasma         | 5h               | proteins                                | BNP, MMP-9, D-dimer, S100B, CRP                                                                                                                                                                                             |
| Giannopoulos 2008 (147) | Greece  | Case control study | IS vs. Controls                               | Not stated          | CT      | plasma         | 24h              | proteins                                | Endothelin-1, CRP, fibrinogen                                                                                                                                                                                               |
| Garlichs 2003 (148)     | Germany | Case control study | IS vs. TIA; IS vs. Controls; TIA vs. Controls | Neurology ward      | CT      | serum; plasma  | 24h              | proteins                                | platelet CD154, platelet P-selectin, soluble CD154, monocyte CD40, MCP-1                                                                                                                                                    |
| Foerch 2012 (149)       | Germany | Prospective study  | IS vs. HS; IS vs. SM; HS vs. SM               | Stroke centre       | CT; MRI | plasma         | 4.5h             | proteins                                | GFAP                                                                                                                                                                                                                        |
| Foerch 2006 (150)       | Germany | Prospective study  | IS vs. HS                                     | Stroke unit or NICU | CT; MRI | serum          | 6h               | proteins                                | GFAP                                                                                                                                                                                                                        |
| Fiszer 1998 (151)       | Poland  | Case control study | IS vs. Controls                               | Not stated          | CT      | whole blood    | 12h              | proteins                                | CD54, CD11a, CD11b, CD18                                                                                                                                                                                                    |
| Fassbender 1997 (152)   | Germany | Case control study | IS vs. Controls                               | Not stated          | CT      | serum          | 24h; 10h, 8h, 4h | proteins                                | S100B, NSE                                                                                                                                                                                                                  |

|                       |             |                    |                                                                                              |                                       |            |               |                |                           |                                                                                                                                                                                                                                                                                                    |
|-----------------------|-------------|--------------------|----------------------------------------------------------------------------------------------|---------------------------------------|------------|---------------|----------------|---------------------------|----------------------------------------------------------------------------------------------------------------------------------------------------------------------------------------------------------------------------------------------------------------------------------------------------|
| Fang 2018 (153)       | China       | Prospective study  | IS vs. HS; IS vs. SM; IS vs. Controls; HS vs. SM; HS vs. Controls; Total stroke vs. controls | ED                                    | Not stated | plasma        | 24h            | proteins                  | S100B, CRP, IL-6, PAI-1, MMP-9, P-selectin, ICAM-1, TNF $\alpha$ , LDL, IL-10, NO, GFAP                                                                                                                                                                                                            |
| Ewida 2021 (154)      | Egypt       | Prospective study  | IS vs. HS; IS vs. Controls; HS vs. Controls; Total stroke vs. controls                       | Neurology ward                        | CT; MRI    | serum         | 24h            | transcripts; proteins     | IS vs. HS( lncRNAs HIF1A-AS2, lncRNAs LINK-A, mRNA HIF1- $\alpha$ , MDA, VEGF), IS vs. control (PI3K, p?Akt, VEGFR2, TIE2), HS vs. control (PI3K, p?Akt, VEGFR2, TIE2), total stroke vs. control(lncRNAs HIF1A-AS2, lncRNAs LINK-A, mRNA HIF1-?, TAC, VEGF, ANG1, BDNF, PI3K, p?Akt, VEGFR2, TIE2) |
| Ekingen 2017 (155)    | Turkey      | Prospective study  | IS vs. Controls                                                                              | ED                                    | CT         | serum         | 24h            | proteins                  | Galectin-3, GFAP                                                                                                                                                                                                                                                                                   |
| Dvorak 2009 (156)     | Germany     | Prospective study  | IS vs. HS                                                                                    | Not stated                            | CT; MRI    | serum         | 6h; 4h; 3h; 2h | proteins                  | GFAP                                                                                                                                                                                                                                                                                               |
| Duan 2015 (157)       | China       | Prospective study  | IS vs. Controls                                                                              | ED                                    | CT; MRI    | serum         | 24h            | proteins                  | CXCL12                                                                                                                                                                                                                                                                                             |
| De Marchis 2018 (158) | Switzerland | Prospective study  | IS vs. TIA; IS+TIA vs. control                                                               | ED                                    | MRI        | serum         | 24h            | proteins                  | NfL                                                                                                                                                                                                                                                                                                |
| Dassan 2012 (159)     | UK          | Prospective study  | IS vs. SM                                                                                    | ED                                    | MRI        | serum         | 24h            | proteins                  | VEGF                                                                                                                                                                                                                                                                                               |
| Dambinova 2003 (160)  | Russia      | Prospective study  | IS vs. HS; IS vs. TIA; IS vs. Controls; TIA vs. Controls                                     | Neurology and Neurosurgery Department | CT; MRI    | serum         | 3h             | proteins                  | NR2A/2B aAb                                                                                                                                                                                                                                                                                        |
| Dambinova 2012 (161)  | USA         | Prospective study  | IS vs. Controls                                                                              | ED                                    | CT; MRI    | plasma        | 12h            | proteins                  | NR2 peptide                                                                                                                                                                                                                                                                                        |
| Cheng 2018 (162)      | China       | Prospective study  | IS vs. Controls                                                                              | ED                                    | CT; MRI    | serum         | 24h            | transcripts               | miR-148b-3p, miR-151b, miR-27b-3p                                                                                                                                                                                                                                                                  |
| Chen 2018 (163)       | China       | Prospective study  | IS vs. Controls                                                                              | Not stated                            | MRI        | serum; plasma | 24h            | transcripts; proteins     | miR-146b, hsCRP, IL-6                                                                                                                                                                                                                                                                              |
| Cavrak 2021 (164)     | USA         | Case control study | IS vs. TIA; IS vs. SM; TIA vs. SM                                                            | ED                                    | MRI        | whole blood   | 24h            | cell count and percentage | neutrophil percentage > 60                                                                                                                                                                                                                                                                         |
| Cano 2003 (165)       | Venezuela   | Prospective study  | IS vs. Controls                                                                              | ED                                    | CT         | serum         | 24h            | metabolites               | malondialdehyde, nitric oxide                                                                                                                                                                                                                                                                      |
| Cakmak 2014 (166)     | Turkey      | Prospective study  | IS vs. Controls                                                                              | ED                                    | CT; MRI    | serum         | 24h            | proteins                  | IMA, S100B, NSE                                                                                                                                                                                                                                                                                    |
| Büttner 1997 (167)    | Germany     | Prospective study  | IS vs. Controls                                                                              | Not stated                            | CT         | serum         | 24h; 12h       | proteins                  | S100B                                                                                                                                                                                                                                                                                              |
| Bustamante 2021 (168) | Spain       | Prospective study  | IS vs. HS                                                                                    | ED                                    | CT; MRI    | plasma        | 4.5h           | proteins                  | GFAP, RBP-4, NT-proBNP, endostatin                                                                                                                                                                                                                                                                 |
| Bustamante 2017 (169) | Spain       | Prospective study  | IS vs. HS; Total stroke vs. SM                                                               | ED                                    | CT; MRI    | plasma        | 6h             | proteins                  | NT-proBNP, IGFBP-3, TNF-R1, GroA, FasL, IL-6, D-dimer, vWF, VAP-1, Endostatin, S100B, Hsc70, Apo CIII, NCAM, MMP-9, bNGF, Caspase-3, NSE, cFn, IL-2RG, IL-17A                                                                                                                                      |

|                          |             |                     |                                                                               |                |            |             |         |                 |                                                                                                                                                        |
|--------------------------|-------------|---------------------|-------------------------------------------------------------------------------|----------------|------------|-------------|---------|-----------------|--------------------------------------------------------------------------------------------------------------------------------------------------------|
| Bolayir 2019 (170)       | Turkey      | Prospective study   | IS vs. Controls                                                               | Neurology ward | CT; MRI    | serum       | 24h     | proteins        | SCUBE1, hsCRP                                                                                                                                          |
| Bibl 2012 (171)          | Germany     | Case control study  | IS vs. Controls                                                               | Not stated     | CT; MRI    | plasma      | 12h     | proteins        | Abeta1-37, Abeta1-38                                                                                                                                   |
| Barr 2010 (172)          | UK          | Case control study  | IS vs. Controls                                                               | Not stated     | MRI        | whole blood | 24h     | Genomics        | ARG1 gene, CA4 gene, CCR7 gene, CSPG2 gene, IQGAP1 gene, LY96 gene, MMP9 gene, ORM1 gene, S100A12 gene                                                 |
| Azarpazhooh 2010 (173)   | Iran        | Case control study  | IS vs. HS; Total stroke vs. controls                                          | Not stated     | CT; MRI    | serum       | 24h     | proteins        | anti-HSP27, hsCRP                                                                                                                                      |
| Atik 2016 (174)          | Turkey      | Prospective study   | IS vs. Controls; HS vs. Controls                                              | ED             | CT; MRI    | serum       | 12h; 3h | proteins        | albumin, ischemic modified albumin (IMA), IMA/albumin ratio (IMAR), total antioxidant status, total oxidant status (TOS), oxidative stress index (OSI) |
| Alvarez-Perez 2011 (175) | Portugal    | Prospective study   | IS vs. Controls                                                               | ED             | Not stated | plasma      | 24h     | proteins        | fibrinogen, CRP                                                                                                                                        |
| Allard 2004 (176)        | Switzerland | Prospective study   | IS vs. HS; IS vs. Controls; HS vs. Controls; Total stroke vs. controls        | ED             | CT; MRI    | plasma      | 6h      | Proteomics      | ApoC-I, ApoC-III                                                                                                                                       |
| Allard 2005 (177)        | Switzerland | Retrospective study | IS vs. Controls; HS vs. Controls; TIA vs. Controls; Total stroke vs. controls | ED             | CT; MRI    | plasma      | 24h     | proteins        | PARK7, NDKA                                                                                                                                            |
| Algin 2019 (178)         | Turkey      | Prospective study   | IS vs. Controls                                                               | ED             | MRI        | serum       | 4h      | proteins        | BDNF, VILIP-1                                                                                                                                          |
| Algawwam 2021 (179)      | Iraq        | Prospective study   | IS vs. Controls                                                               | Not stated     | Not stated | serum       | 24h     | proteins        | GPBB                                                                                                                                                   |
| Ahn 2011 (180)           | Korea       | Prospective study   | IS vs. SM                                                                     | ED             | CT; MRI    | serum       | 6h      | proteins        | IMA index, IMA                                                                                                                                         |
| Sadik 2021 (181)         | Egypt       | Prospective study   | IS vs. Controls                                                               | Not stated     | CT         | serum       | 12h     | transcripts     | miR-155, JAK2 mRNA, STAT3 mRNA                                                                                                                         |
| Abe 2020 (182)           | Japan       | Prospective study   | IS vs. Controls                                                               | Not stated     | Not stated | whole blood | 12h     | Transcriptomics | miR-505-5p, miR-1255b-5p, miR-550b-2-5p, miR-4523, miR-6795-3p                                                                                         |

IS: ischemic stroke; HS: haemorrhagic stroke; SM: stroke mimics; TIA: transient ischemic attack



**Supplementary Table 3: Brain-specific or enriched biomarkers for diagnosis of ischaemic stroke in early stage**

| Brain-specific/enriched biomarkers | Study ID            | Study design | Sample size                                                                           | Specimen       | Time point         | Comparison     | Sensitivity | Specificity | AUC                   |
|------------------------------------|---------------------|--------------|---------------------------------------------------------------------------------------|----------------|--------------------|----------------|-------------|-------------|-----------------------|
| BDNF                               | Algin 2019 (178)    | Prospective  | IS 75, control (healthy) 28                                                           | serum          | 4h                 | IS vs. control | 100%        | 92%         | 0.983(0.966-1)        |
| VILIP-1                            |                     |              |                                                                                       |                | NA                 |                | NA          | NA          |                       |
| B-FABP                             | Wunderlich 2005(21) | Prospective  | IS 42, control (healthy) 80                                                           | serum          | 3,4,5,6, 12,18,24h |                | NA          | NA          | NA                    |
| MBP                                | Can 2015 (27)       | Prospective  | IS 50, control (healthy) 34                                                           | serum          | 12h                |                | NA          | NA          | NA                    |
| miR-107                            | Yang 2016 (46)      | Case control | IS 114, control (healthy) 58                                                          | plasma         | 24h                |                | 93.8%       | 92.2%       | 0.97                  |
| miR-128b                           |                     |              |                                                                                       |                |                    |                | 72.8%       | 92%         | 0.903                 |
| miR-153                            |                     |              |                                                                                       |                |                    |                | 91.2%       | 74%         | 0.893                 |
| miR-124                            | Zhou 2021 (1)       | Case control | IS 108, control (healthy) 108                                                         | serum          | 24h                |                | 91.67 %     | 93.52%      | 0.9527                |
|                                    | Liu 2015 (115)      | Prospective  | IS 31, control (healthy) 11                                                           | serum          | 24h                |                |             |             | 0.76(0.61-0.92)       |
| GMFB                               | Yuan 2020 (44)      | Case control | IS 40, control (healthy) 40                                                           | plasma         | 24h                |                | NA          | NA          | NA                    |
| miR-134                            | Zhou 2018 (36)      | Case control | IS 50, control (healthy) 50                                                           | serum; exosome | 24h                |                | 75.3%       | 72.8%       | 0.834(0.88-0.97)      |
| miR-16                             | Tian 2016 (62)      | Prospective  | test cohort: IS 7, control(healthy) 4; validation cohort: IS 33, control (healthy) 23 | plasma         | 6h                 |                | 69.7%       | 87%         | 0.775                 |
| miR-9                              | Ji 2016 (139)       | Case control | IS 65, control (non-stroke) 66                                                        | serum; exosome | 24h                |                | NA          | NA          | 0.8026(0.7235-0.8816) |
| miR-124                            |                     |              |                                                                                       |                |                    |                | NA          | NA          | 0.6976(0.6506-0.7895) |
| NfL                                | Tiedt 2018 (32)     | Prospective  | IS 196, control (healthy) 30; cohort2: 95 IS                                          | serum          | 24h                |                | NA          | NA          | NA                    |
| NfL                                | O'Connell 2020 (99) | Case control | IS 14, control (risk factor non-neurological symptom) 33                              | plasma         | 24h                |                | 92.9%       | 84.9%       | 0.88(0.75-0.96)       |
| Tau                                |                     |              |                                                                                       |                |                    |                | 85.7%       | 54.6%       | 0.69(0.54-0.82)       |
| NfL+ Tau                           |                     |              |                                                                                       |                |                    |                | 71.4%       | 87.9%       | 0.81(0.67-0.91)       |
| NfL                                | Nielsen 2020 (100)  | Prospective  | IS 31, TIA 9, control (healthy) 29                                                    | plasma         | 8h                 |                | NA          | NA          | NA                    |
| S100B                              |                     |              |                                                                                       |                |                    |                | NA          | NA          | NA                    |

|                |                       |               |                                                                                |        |             |           |                     |                  |                    |
|----------------|-----------------------|---------------|--------------------------------------------------------------------------------|--------|-------------|-----------|---------------------|------------------|--------------------|
| S100B          | Kokocinska 2005 (126) | Case control  | IS 47, control (healthy) 10                                                    | serum  | 12h         |           | NA                  | NA               | NA                 |
|                | Büttner 1997 (167)    | Prospective   | IS 26, control (healthy) 26                                                    | serum  | 12h, 24h    |           | NA                  | NA               | NA                 |
|                | Fang 2018 (153)       | Prospective   | IS 262, control (healthy) 200                                                  | plasma | 24h         |           | NA                  | NA               | 0.98               |
| S100B          | Fassbender 1997 (152) | Case control  | IS 24, control (healthy) 24                                                    | serum  | 8h,10h, 24h |           | NA                  | NA               | NA                 |
| NSE            |                       |               |                                                                                |        | NA          |           | NA                  | NA               |                    |
| S100B          | Cakmak 2014 (166)     | Prospective   | IS 38, control (ED patients without acute focal neurological deficit) 30       | serum  | 24h         |           | 87%                 | 72%              | 0.89(0.81-0.96)    |
| NSE            |                       |               |                                                                                |        |             |           | 61%                 | 53%              | 0.67(0.55-0.80)    |
| S100B+NSE      |                       |               |                                                                                |        |             |           | 92%                 | 47%              | NA                 |
| GFAP           | Ekingen 2017 (155)    | Prospective   | IS normal CT 17, control (healthy) 50                                          | serum  | 24h         |           | 70.59 %             | 70%              | NA                 |
| VILIP-1(VLP-1) | Stejskal 2011 (64)    | Case control  | IS 16, control (healthy) 17                                                    | serum  | 3h          |           | 100%                | 100%             | 1.0 (0.93-1)       |
|                | Laterza 2006 (123)    | Case control  | IS 18, control not stated                                                      | plasma | 24h         |           | NA                  | NA               | NA                 |
|                |                       |               |                                                                                |        |             |           |                     |                  |                    |
| GFAP           | Bustamante 2021 (168) | Prospective   | IS 154, HS 35, SM 62                                                           | plasma | 4.5h        | IS vs. HS | 37.1%               | 99.4%            | NA                 |
| GFAP           | Stanca 2015 (65)      | Prospective   | IS 49, HS(ICH) 23, control (healthy) 52                                        | serum  | 12h         |           | 94%                 | 69%              | NA                 |
| aAbs-NR2+GFAP  |                       |               |                                                                                |        |             |           | 94%                 | 91%              | NA                 |
|                |                       |               |                                                                                |        |             |           |                     |                  |                    |
| GFAP           | Xiong 2015(47)        | Prospective   | IS 65, HS(ICH) 43                                                              | serum  | 6h          |           | 86%                 | 76.9%            | 0.901(0.808-0.95)  |
|                | Rozanski 2017 (77)    | Prospective   | IS 49, HS(ICH) 25                                                              | plasma | 1h          |           | 24%                 | 100%             | NA                 |
|                |                       |               |                                                                                |        | 3h          |           | 36%                 | 100%             | NA                 |
|                | Mattila 2021 (105)    | Prospective   | IS 203(IS 195, TIA 8), HS 60 (ICH 50, SAH 2, both 8), SM 9                     | plasma | 3h          |           | 96.6%               | 68%              | 0.781(0.712-0.85)  |
|                | Llombart 2016(114)    | Retrospective | cohort1: IS 36, HS(ICH)10, cohort2: IS16, HS(ICH)16, cohort3: IS 38, HS(ICH)28 | plasma | 6h          |           | 68.4% (GFAP +RBP4 ) | 84% (GFAP+ RBP4) | NA                 |
|                | Katsanos 2017 (131)   | Prospective   | IS 121, HS 36(ICH 31, SAH 5), SM 31, control (healthy)79                       | plasma | 6h          |           | 91%                 | 97%              | 0.97(0.92-1.00)    |
|                | Foerch 2012 (149)     | Prospective   | IS 163, HS 39, SM 3                                                            | plasma | 4.5h        |           | 84.2%               | 96.3%            | 0.915(0.847-0.982) |
|                | Foerch 2006 (150)     | Prospective   | HS 42, IS 93                                                                   | serum  | 6h          |           | 79%                 | 98%              | NA                 |
|                |                       | Prospective   | IS 45, HS 18                                                                   |        | 2h          |           | 45%                 | 100%             | NA                 |

|                 |                       |              |                                                   |        |            |            |       |                    |                    |
|-----------------|-----------------------|--------------|---------------------------------------------------|--------|------------|------------|-------|--------------------|--------------------|
|                 | Dvorak 2009 (156)     |              |                                                   | serum  | 3h         | HS vs. IS  | 65%   | 100%               | NA                 |
|                 |                       |              |                                                   |        | 4h         |            | 70%   | 100%               | NA                 |
|                 |                       |              |                                                   |        | 6h         |            | 71%   | 95%                | NA                 |
| miR-124-3p      |                       |              |                                                   |        | 24h        |            | 68.4% | 71.2%              | 0.70(0.59-0.79)    |
| miR-16          | Leung 2014 (122)      | Prospective  | IS 74, HS 19, control (healthy) 23                | plasma |            |            | 94.7% | 35.1%              | 0.66(0.55-0.76)    |
|                 | Rainer 2007 (31)      | Prospective  | IS 118, HS 35, image-negative clinical stroke 44  | plasma | 24h        |            | NA    | NA                 | NA                 |
| S100            | Zhou 2016 (35)        | Prospective  | IS 71, HS(ICH) 46                                 | plasma | 6h         |            | 95.7% | 70.4%              | 0.903              |
| S100B+sRA<br>GE | Montaner 2012 (103)   | Prospective  | IS 279, HS(ICH) 58                                | plasma | 6h         |            | 22.7% | 80.2%              | NA                 |
| S100B           | Kavalci 2011 (130)    | Prospective  | IS 71, HS 29, control 20                          | serum  | 24h        |            | NA    | NA                 | NA                 |
| S100B           |                       |              |                                                   |        | 24h        |            | 77.8% | 69.2%              | 0.778(0.582-0.973) |
| MBP             | Liswati 2009 (118)    | Case control | IS 25, HS 19                                      | plasma |            | 88.9%      | 69.2% | 0.855(0.699-1.000) |                    |
|                 |                       |              |                                                   |        | 4.5h       | NA         | NA    | 0.64(0.47-0.81)    |                    |
| UCH-L1          |                       |              |                                                   |        | 24h        | NA         | NA    | 0.62(0.51-0.72)    |                    |
|                 |                       |              |                                                   |        | 4.5h       | 61%        | 96%   | 0.86(0.73-0.99)    |                    |
| GFAP            | Ren 2016 (82)         | Case control | ICH 45, IS 79, SAH 5, TIA 3, control (healthy) 57 | serum  | 24h        | 67%        | 91%   | 0.87(0.80-0.94)    |                    |
|                 |                       |              |                                                   |        |            |            |       |                    |                    |
| CTNND2          | Simats 2020 (69)      | Case control | IS 71, SM 36                                      | plasma | 6h         | IS vs. SM  | NA    | NA                 | 0.76 (0.66-0.86)   |
|                 | Glickman 2011 (146)   | Prospective  | IS 34, SM 29                                      | plasma | 5(3.5-8) h |            | NA    | NA                 | NA                 |
| S100B           | Park 2013 (89)        | Prospective  | IS 111, SM 127                                    | plasma | 24h        |            | 54%   | 83.5%              | 0.7                |
|                 |                       |              |                                                   |        |            |            |       |                    |                    |
| NfL             | De Marchis 2018 (158) | Prospective  | IS 504, TIA 111, control (healthy) 165            | serum  | 24h        | IS vs. TIA | NA    | NA                 | NA                 |

GFAP: Glial Fibrillary Acidic Protein; B-FABP: Brain-type Fatty Acid-Binding Proteins; MBP: Myelin Basic Protein; S100B: S100 calcium-binding protein B; NSE: Neuron-Specific Enolase; NfL, Neurofilament Light chain; CTNND2: Catenin delta-2; UCH-L1: Ubiquitin Carboxyl-terminal Hydrolase isozyme L1; VILIP-1(VLP-1): Visinin-like protein 1; GMFB: Glial Maturation Factor Beta; IS: ischaemic stroke; HS: haemorrhagic stroke; SM: stroke mimics; TIA: transient ischaemic attack; ICH: intracerebral hemorrhage; SAH: subarachnoid hemorrhage; ED: emergency department.

**Supplementary Table 4: Characteristics of included high-throughput omics studies**

| Study ID            | Design                                         | Omics               | Assay                         | Algorithm/method of data dimension-reduce                   | Cohort 1                                                               | Cohort 2                   | Cohort 3                  | Total sample size | Sampling time | Specimen                        | Biomarker NO. | As a Panel |
|---------------------|------------------------------------------------|---------------------|-------------------------------|-------------------------------------------------------------|------------------------------------------------------------------------|----------------------------|---------------------------|-------------------|---------------|---------------------------------|---------------|------------|
| Tang 2006 (30)      | Case control study                             | <b>Genomics</b>     | Oligonucleotide microarrays   | The Prediction Analysis of Microarrays (PAM)                | IS 15, control 3                                                       | NO                         | NO                        | 18                | 24h; 5h; 3h   | whole blood (Paxgene RNA tubes) | 18            | No         |
| Stamova 2010 (66)   | Case control study                             | <b>Genomics</b>     | Whole genome microarray       | The Prediction Analysis of Microarrays (PAM)                | IS 70, control: healthy 38, vascular risk 52, myocardial infarction 17 | NO                         | NO                        | 177               | 24h; 5h; 3h   | whole blood                     | 97            | Yes        |
| Pan 2020 (91)       | Case control study                             | <b>Genomics</b>     | RNA sequencing, qRT-PCR       | GO and KEGG enrichment to choose inflammation related genes | IS male 8, control (healthy male) 4                                    | NO                         | NO                        | 12                | 7.5h          | Platelet                        | 1             | No         |
| O'Connell 2016 (96) | Case control study                             | <b>Genomics</b>     | RNA microarray                | Machine-learning (GA/ KNN)                                  | IS 39, control (neurologically asymptomatic) 24                        | IS 39, control 30, SM 20   | NO                        | 152               | 4.5h; 5.3h    | whole blood (Paxgene RNA tubes) | 10            | Yes        |
| Barr 2010 (172)     | Case control study                             | <b>Genomics</b>     | RNA gene expression profiling | BeadStudio; GeneSpring                                      | IS 39, control (non-stroke) 25                                         | NO                         | NO                        | 63                | 24h           | whole blood (Paxgene RNA tubes) | 9             | No         |
| Laterza 2006 (123)  | Case control study + animal experimental study | <b>Genomics</b>     | Gene array, ELISA             | No advanced algorithm                                       | Mouse                                                                  | NO                         | IS 18, control not stated | 18                | 24h           | Plasma                          | 1             | No         |
| Zhang 2017 (41)     | Case control study                             | <b>Metabolomics</b> | MS                            | Artificial neural network (ANN)                             | IS 103, HS(ICH)103, control(healthy) 65                                | IS 26, HS(ICH) 25          | NO                        | 322               | 12h           | dried blood spot                | 36            | Yes        |
| Tiedt 2020 (60)     | Prospective study                              | <b>Metabolomics</b> | UPLC-MS/MS                    | Random forest                                               | IS 40, SM 33, control (neurological normal) 72                         | IS 105, SM 105, control 40 | IS 289, SM 211            | 969               | 24h           | Serum                           | 4             | Yes        |

|                           |                                                |                                             |                                              |                                                                                          |                                                                    |                                      |    |     |        |             |    |     |
|---------------------------|------------------------------------------------|---------------------------------------------|----------------------------------------------|------------------------------------------------------------------------------------------|--------------------------------------------------------------------|--------------------------------------|----|-----|--------|-------------|----|-----|
| Liu 2017 (116)            | Case control study                             | <b>Metabolomics</b>                         | MS                                           | Logistic regression, Naïve Bayes, Neural network, Random Forest, Support vector machine  | IS 40, control 40                                                  | IS 26, control 23                    | NO | 129 | 9h     | Serum       | 5  | Yes |
| Jiang 2011 (137)          | Case control study                             | <b>Metabolomics</b>                         | UPLC-TOF-MS                                  | K-Nearest Neighbour (KNN)                                                                | IS 67, control (routine physical check-up people) 62               | NO                                   | NO | 129 | 6h     | Serum       | 12 | No  |
| Maly 2021(108)            | Cross-sectional study                          | <b>Metabolomics(lipidomics)</b>             | UHPLC-HRMS                                   | supervised statistical methods                                                           | IS 49, control 82                                                  | NO                                   | NO | 131 | 4.5h   | Plasma      | 27 | No  |
| Kimberly 2013(28)         | Prospective study + animal experimental study  | <b>Metabolomics; targeted</b>               | LC-MS/MS                                     | Principal component analysis (PCA), partial least-squares discriminant analysis (PLS-DA) | Rat                                                                | IS 32, control (TIA + non-stroke) 52 | NO | 84  | 2h; 9h | Plasma      | 18 | Yes |
| Turek-Jakubowska 2022 (4) | Case control study                             | <b>Proteomics</b>                           | LC-MS                                        | Diffprot software                                                                        | IS 32, control 28                                                  | NO                                   | NO | 60  | 24h    | Plasma      | 1  | No  |
| Song 2019(68)             | Case control study + animal experimental study | <b>Proteomics</b>                           | LC-MS/MS, ELISA                              | Principal component analysis (PCA)                                                       | Mouse                                                              | IS 70, control (healthy) 70          | NO | 140 | 24h    | Serum       | 2  | No  |
| Sharma 2015(73)           | Case control study                             | <b>Proteomics</b>                           | iTRAQ-Based LC-MS                            | None                                                                                     | IS 50, control (healthy) 35                                        | NO                                   | NO | 85  | 24h    | Serum       | 3  | No  |
| Rico Santana 2014(79)     | Case control study                             | <b>Proteomics</b>                           | MALDI-TOF MS                                 | None                                                                                     | IS 45, control (TIA+ HS+ SM+ head injury) 18, control (healthy) 56 | NO                                   | NO | 119 | 6h     | Serum       | 1  | No  |
| Penn 2018 (88)            | Prospective study                              | <b>Proteomics ; targeted</b>                | LC/MS-MS, ELISA                              | None                                                                                     | IS 20, control (outpatient neurology clinic) 20                    | NO                                   | NO | 40  | 24h    | Plasma      | 30 | Yes |
| O'Connell 2019 (95)       | Case control study                             | <b>Proteomics</b>                           | Custom-fabricated high-density peptide array | Random forest                                                                            | IS 19, HS 17, SM 20                                                | NO                                   | NO | 56  | 12h    | whole blood | 17 | Yes |
| Nahan 2017 (102)          | Case control study                             | <b>Proteomics (targeted metalloprotein)</b> | MS                                           | Principal component analysis (PCA)                                                       | IS 14, paired control 14; HS(ICH) 23, paired control 23            | NO                                   | NO | 74  | 12h    | Plasma      | 36 | No  |

|                       |                                                |                                                |                                 |                                                         |                                               |                             |                                                                   |     |         |                 |             |     |
|-----------------------|------------------------------------------------|------------------------------------------------|---------------------------------|---------------------------------------------------------|-----------------------------------------------|-----------------------------|-------------------------------------------------------------------|-----|---------|-----------------|-------------|-----|
| Kodali 2013 (127)     | Case control study                             | <b>Proteomics ; targeted</b>                   | Nano-LC-ESIMS                   | None                                                    | IS 10, HS 9, SM 10                            | NO                          | NO                                                                | 29  | 12h     | Plasma          | 8           | No  |
| Kodali 2012 (128)     | Case control study                             | <b>Proteomics (metals and metalloproteins)</b> | ICP-MS followed by ESIMS        | None                                                    | IS 10, HS 9, SM 10                            | NO                          | NO                                                                | 29  | 12h     | Plasma          | 6           | No  |
| Gawryś 2022 (9)       | Case control study                             | <b>Proteomics (platelet)</b>                   | LC-MS                           | None                                                    | IS 32, control 29                             | NO                          | NO                                                                | 61  | 24h     | platelet        | 8           | No  |
| Simats 2018 (70)      | Case control study + animal experimental study | <b>Proteomics</b>                              | SOMAscan proteomic assay, ELISA | None                                                    | Rat                                           | IS 38, control 8            | NO                                                                | 46  | 6h      | Plasma          | 2           | No  |
| Yang 2022 (3)         | Case control study                             | <b>Transcript omics</b>                        | CircRNA microarray, qRT-PCR     | Volcano plot and heatmap                                | IS 10, control 10                             | NO                          | NO                                                                | 20  | 12h     | plasma; exosome | 4           | No  |
| Tian 2022 (5)         | Case control study                             | <b>Transcript omics</b>                        | RNA microarray, qRT-PCR         | Heatmap and hierarchical clustering                     | IS 39, control 39                             | NO                          | NO                                                                | 78  | 6h      | whole blood     | 1           | No  |
| Tiedt 2017 (59)       | Prospective study                              | <b>Transcript omics</b>                        | RNA Sequencing                  | None                                                    | IS 20, control (healthy) 20                   | IS 40, control (healthy) 40 | IS 200, control (healthy) 100, TIA 72                             | 492 | 24h     | Plasma          | 3           | Yes |
| Tian 2016 (62)        | Prospective study                              | <b>Transcript omics</b>                        | miRNAs microarrays, qRT-PCR     | Clustering heatmap                                      | IS 7, control (healthy) 4                     | IS 33, control (healthy) 23 | NO                                                                | 67  | 6h      | Plasma          | 1           | No  |
| Stamova 2019 (67)     | Case control study                             | <b>Transcript omics</b>                        | RNA microarray                  | None                                                    | IS 33, HS (ICH) 33, control (risk factors) 33 | NO                          | NO                                                                | 99  | 24h     | not stated      | not exactly | No  |
| Sepramaniam 2014 (75) | Prospective study + animal experimental study  | <b>Transcript omics</b>                        | microRNA microarray, qRT-PCR    | None                                                    | IS 68, control (healthy) 24                   | IS 101                      | Metabolic syndrome patients 94<br><br>At last, validation in rats | 287 | 24h     | whole blood     | 5           | No  |
| Nguyen 2020 (101)     | Prospective study                              | <b>Transcript omics</b>                        | Small RNA-sequencing            | LASSO (least absolute shrinkage and selection operator) | IS 9, HS(ICH)8, SM 9                          | IS 20, control (healthy) 20 | NO                                                                | 66  | 6h      | Plasma          | 3           | Yes |
| Lu 2020 (112)         | Case control study + animal                    | <b>Transcript omics</b>                        | CircRNA Microarray, RT-qPCR     | None                                                    | Mouse                                         |                             | NO                                                                | 16  | 24h; 3h | whole blood     | 2           | No  |

|                   |                                                |                                      |                                                          |                                                                                                                                                                                        |                                              |                   |    |     |     |             |    |     |
|-------------------|------------------------------------------------|--------------------------------------|----------------------------------------------------------|----------------------------------------------------------------------------------------------------------------------------------------------------------------------------------------|----------------------------------------------|-------------------|----|-----|-----|-------------|----|-----|
|                   | experimental study                             |                                      |                                                          |                                                                                                                                                                                        |                                              | IS 8, control 8   |    |     |     |             |    |     |
| Li 2015 (120)     | Case control study                             | <b>Transcript omics</b>              | miRNA microarray, qRT-PCR                                | None                                                                                                                                                                                   | IS 117, control (healthy) 82                 | IS 53, control 50 | NO | 199 | 24h | Serum       | 4  | No  |
| Abe 2020 (182)    | Prospective study                              | <b>Transcript omics</b>              | miRNA Array                                              | Principal component analysis (PCA)                                                                                                                                                     | IS 22, controls (without stroke symptoms) 22 | NO                | NO | 44  | 12h | whole blood | 5  | No  |
| Kalani 2020 (135) | Prospective study                              | <b>Transcript omics</b>              | RNA sequencing                                           | LASSO (least absolute shrinkage and selection operator)                                                                                                                                | IS 21, HS 36 (ICH 19, SAH 17)                | NO                | NO | 57  | 24h | Plasma      | 13 | Yes |
| Simats 2020 (69)  | Case control study + animal experimental study | <b>Transcript omics + Proteomics</b> | Whole-genome microarray, BCA Protein Assay, LC-MS, ELISA | Ingenuity Pathway Analysis (IPA), Principal Component Analysis (PCA), Multiple Co-Inertia Analysis (MCIA), regularized Canonical Correlation Analysis (rCCA), Multiple Factor Analysis | Mouse                                        | IS 71, SM 36      | NO | 107 | 6h  | Plasma      | 1  | NO  |

IS: ischemic stroke; HS: haemorrhagic stroke; SM: stroke mimics; TIA: transient ischemic attack

## Supplementary list 5: Biomarkers pooled from high-throughput omics studies

### 103 Genes:

ABCA1, AMN1, ANKRD28, ANTXR2, ARG1, ASTN2, BCL6, BST1, RPF1, CA4, CCDC144A, CCR7, ACKR4, CD163, CHMP1B, CKAP4, CKLF, CLEC4E, CPEB2, CSPG2, CTSZ, CXADR, DLX6, EGR2, ELAVL2, ELL2, ENTPD1, ETS2, F5, FAR2, FAT3, FCHO2, FCRL4, FGD4, FOXA2, FPR1, GAB1, GABRB2, GADL1, GLYATL1, GRAP, GYPA, H2AC18, HNRNPH2, HNRNPUL2, ID3, IFRD1, IQGAP1, KIAA0319, KIF1B, LAMP2, LDB3, LECT2, PPFIBP1, LTB4R, LY96, MAL, MCTP1, MMP9, NPL, ORM1, OSBPL1A, OVOL2, PDK4, PGM5, PHTF1, PLXDC2, PRTG, PTPRD, PYGL, QKI, RBM25, RBMS3, REM2, RNASE2, RNF141, RPL22, RRAGD, S100A12, S100A9, S100P, SCD5, SH3GL3, SHOX, SLC16A6, SNIP1, SNRPN, SPIB, SPTLC3, ST3GAL6, STK3, TBX5, THBD, THSD4, TIMM8A, TIMP2, UBR5, UBXN2B, UNC5B, VAPA, VSNL1, VNN3, ZNF608

### 79 proteins (or peptides):

2155-Da peptide, ADAMTS13, AEQREFNKHLSA, Alpha-1B-glycoprotein, Amyloid-like protein 2, Antithrombin-III, APFGQKDALGL, ApoC-I, ApoC-III, Apolipoprotein D, AWQKSKGVALSG, Beta-amyloid protein A4, calpain-15, Calponin, Coagulation factor XII, CKB, Clusterin, CMPK, coactosin-like protein, Coagulation factor V, Coagulation factor XI, Collagen alpha-1(IV) chain, Complement C3, Complement component 4b (C4b and C4a), CRP, CTNND2, cystatin C (CST3), E-selectin, EKLYYHDSQEKH, Epidermal growth factor receptor (EGFR), Fatty acid binding protein 3 (FABP3), Fibrinogen alpha chain, Fibrinogen beta chain, Fibrinogen gamma chain, GASVHDGVALSG, GDRRPLGVALSG, GEYFRWNWDSVA, Guanylate cyclase A(NPR1) (ANPR1), histone proteins (H2A type 1 and 1-A, H2A types 2B and J, H2Av, -z, and -x), IGF-1, IL-6, Insulin-like growth factor-binding protein 3 (IBP 3), interferon regulatory factor 7 (IRF7), KGQRGYHLKHDA, KPEKLNGVALSG, L-selectin, metalloproteins Cu, metalloproteins Mg, metalloproteins Mn, metalloproteins Mo, metalloproteins Pb, metalloproteins Se, Methylenetetrahydrofolate reductase, NNYWANVASGLG, NSLKENGVALSG, NVAVAQDENLAG, PEFRELSKHDVA, PKPHGFPGQEYV, Plasma protease C1 inhibitor (C1 inhibitor), Plasma serine protease inhibitor (Protein C inhibitor), Plasminogen/plasmin/angiostatin, platelet basic protein, Platelet endothelial cell adhesion molecule (PECAM 1), Prolactin, Protein kinase C eta type, Prothrombin/thrombin, QRPDPKDGQAKD, QSLKPKGVALSG, S100A12 (CGRP), S100A7, Serum paraoxonase/aryl esterase 1 (Paraoxonase- PON1), Serum paraoxonase/lactonase 3 (Paraoxonase- PON3), thymidine phosphorylase 4 (TYMP-4), titin Isoform 3, tropomyosin alpha-4 chain, Vitamin K-dependent protein C (Protein C), Vitamin K-dependent protein S (Protein S), Vitamin K-dependent protein Z (Protein Z), VLGPRHEPDSGA, vWF



**97 metabolites:**

(0+2+3+16+18:1)/Cit, (0+2+3016+18:1)/Cit, 5-adenosylhomocysteine, Adenosine, Aldosterone, Arg, Asparagine, asymmetrical dimethylarginine (ADMA), BCAA isoleucine, BCAA leucine, BCAA valine, Betanin, C10, C10:2, C12, C14, C14:2, C16, C16-OH, C16-OH/C16, C16:1-OH, C18, C18-OH, C18:1, C22, C3/Met, C3DC, C3DC/C10, C4, C4-OH, C4DC, C5, C5/C3, C5DC, C5DC/C16, C5DC/C5-OH, Carnitine, cis/trans hydroxyproline, creatinine, cysteamine, cysteine, Deoxocathasterone, FA (16:1), FA (17:1), FA (20:2), FA (20:3), FA (20:4), FA (20:5), FA (22:4), FA (22:5), FA (22:6), FAHFA (14:0/16:2), FAHFA (16:1/18:3), FAHFA (18:1/20:3), FAHFA (18:2/20:4), FAHFA (20:4/18:3), folic acid, glucose, glycine, hexadecanedioate, histidine, Hydroxy eicosatetraenoic acid, Hydroxy octadecadienoic acid, isoleucine, betaine, LPC (20:5), LPC (22:5), LPC (22:6), LPE (18:2), LPE (20:4), LPE (22:6), LPI (18:1), LPI (18:2), Lysine, LysoPE (18:2), Methionine, N-carbamoyl-beta-alanine, oxidized glutathione, PC (5:0/5:0), pregnenolone sulphate, Pro, Proline, S-adenosyl-homocysteine, Serine, Sucrose 6-phosphate, symmetrical dimethylarginine (SDMA), tetradecanedioate, Tetrahydrofolate, TG (14:0\_16:1\_20:3), TG (16:0\_16:1\_18:0), TG (16:0\_18:2\_18:3), TG (16:0\_18:2\_22:6), TG (17:1\_17:2\_19:0), Thr, Threonine, Tyr/Cit, Uridine, Val/Phe

**41 transcripts:**

circ-BBS2, circ-PHKA2, circ\_0041685, circ\_0066867, circ\_0093708, circ\_0112036, lncRNA NR\_120420, miR-106-5p, miR-1246, miR-1255b-5p, miR-125a-5p, miR-125b-2\*, miR-125b-5p, miR-132-3p, miR-134-5p, miR-143-3p, miR-150-3p, miR-16, miR-186-5p, miR-21-3p, miR-27a\*, miR-27b-3p, miR-30e-3p, miR-32-3p, miR-338-3p, miR-342-3p, miR-422a, miR-4286, miR-4523, miR-485-5p, miR-488, miR-5010-5p, miR-505-5p, miR-532-5p, miR-550b-2-5p, miR-627, miR-6795-3p, miR-7c-5p, tRNA-ThrCGT, tRNA-TyrGTA, tRNA-ValCAC

**Supplementary Table 6: Quality assessment results using QUADAS-2**

| STUDY ID                  | Risk of bias      |            |                    |                 | Concerns of applicability |            |                    |
|---------------------------|-------------------|------------|--------------------|-----------------|---------------------------|------------|--------------------|
|                           | PATIENT SELECTION | INDEX TEST | REFERENCE STANDARD | FLOW AND TIMING | PATIENT SELECTION         | INDEX TEST | REFERENCE STANDARD |
| Zhou 2021 (1)             | Unclear           | Low        | Low                | Low             | Low                       | Low        | Low                |
| Zhang 2022 (2)            | Unclear           | High       | Unclear            | Unclear         | Low                       | Low        | Unclear            |
| Yang 2022 (3)             | Unclear           | Low        | Unclear            | Unclear         | Unclear                   | Low        | Unclear            |
| Turek-Jakubowska 2022 (4) | Unclear           | Low        | Low                | Low             | Low                       | Low        | Low                |
| Tian 2022 (5)             | Unclear           | Low        | Unclear            | Unclear         | Low                       | Low        | Unclear            |
| Rahmati 2021 (6)          | Low               | Low        | Low                | Low             | Low                       | Low        | Low                |
| Li 2021 (7)               | Unclear           | Low        | Low                | Low             | Low                       | Low        | Low                |
| Induruwa 2022 (8)         | Low               | Low        | Unclear            | Unclear         | Low                       | Low        | Unclear            |
| Gawryś 2022 (9)           | Low               | Low        | Low                | Low             | Low                       | Low        | Low                |
| Cho 2022 (10)             | Unclear           | Low        | Unclear            | Unclear         | Low                       | Low        | Low                |
| Intiso 2004 (11)          | Low               | Low        | Low                | Low             | Low                       | Low        | Low                |
| Perini 2001(12)           | Low               | Low        | Low                | Low             | Low                       | Low        | Low                |
| Pedersen 2004 (13)        | Unclear           | Low        | Low                | Low             | Low                       | Low        | Low                |
| Nayak 2011 (14)           | Unclear           | Low        | Low                | Low             | Low                       | Low        | Low                |
| Senes 2007 (15)           | Low               | Low        | Unclear            | Unclear         | Low                       | Low        | Unclear            |
| Feng 2019 (16)            | High              | Low        | Low                | Low             | Low                       | Low        | Low                |
| Blann 1999 (17)           | Low               | Low        | Unclear            | Low             | Low                       | Low        | Unclear            |
| Shyu 1997 (18)            | Low               | Low        | Low                | Low             | Low                       | Low        | Low                |
| Liu 2015 (19)             | Low               | Low        | Low                | Low             | Low                       | Low        | Low                |
| Supanc 2011 (20)          | Low               | Low        | Low                | Low             | Low                       | Low        | Low                |
| Wunderlich 2005(21)       | Low               | Low        | Low                | Low             | Low                       | Low        | Low                |
| Hu 2016 (22)              | High              | Low        | Unclear            | Unclear         | Unclear                   | Low        | Unclear            |

|                     |         |     |         |         |         |     |         |
|---------------------|---------|-----|---------|---------|---------|-----|---------|
| Uno 2003 (23)       | Low     | Low | Low     | Low     | Low     | Low | Low     |
| Sun 2019 (24)       | Unclear | Low | Low     | Low     | Low     | Low | Low     |
| Song 2006 (25)      | Low     | Low | Low     | Low     | Low     | Low | Low     |
| Zitnanova 2016 (26) | Low     | Low | Low     | Low     | Low     | Low | Low     |
| Can 2015 (27)       | Low     | Low | Low     | Low     | Low     | Low | Low     |
| Kimberly 2013 (28)  | Low     | Low | Low     | Low     | Low     | Low | Low     |
| Abboud 2007 (29)    | Low     | Low | Low     | Low     | Low     | Low | Low     |
| Tang 2006 (30)      | Unclear | Low | High    | Low     | Low     | Low | Low     |
| Rainer 2007 (31)    | Low     | Low | Low     | Low     | Low     | Low | Low     |
| Tiedt 2018 (32)     | Low     | Low | Low     | Low     | Low     | Low | Low     |
| Zhu 2019 (33)       | Low     | Low | Low     | Low     | Low     | Low | Low     |
| Zhu 2018 (34)       | Unclear | Low | Low     | Low     | Low     | Low | Low     |
| Zhou 2016 (35)      | Unclear | Low | High    | Low     | Low     | Low | Unclear |
| Zhou 2018 (36)      | Unclear | Low | Low     | Low     | Low     | Low | Low     |
| Zhou 2022 (37)      | Low     | Low | Low     | Low     | Low     | Low | Low     |
| Zhao 2016 (38)      | Low     | Low | Unclear | Unclear | Low     | Low | Unclear |
| Zhao 2017 (39)      | High    | Low | Low     | Low     | Low     | Low | Low     |
| Zhao 2016 (40)      | Unclear | Low | Low     | Low     | Low     | Low | Low     |
| Zhang 2017 (41)     | Unclear | Low | Low     | Low     | Low     | Low | Low     |
| Zhang 2020 (42)     | Low     | Low | Low     | Low     | Low     | Low | Low     |
| Zaremba 2006 (43)   | Unclear | Low | Low     | Low     | Low     | Low | Low     |
| Yuan 2020 (44)      | Unclear | Low | Low     | Low     | Low     | Low | Low     |
| Yigit 2017 (45)     | Unclear | Low | Unclear | Unclear | Low     | Low | Unclear |
| Yang 2016 (46)      | Unclear | Low | Low     | Low     | Low     | Low | Low     |
| Xiong 2015(47)      | Low     | Low | Low     | Low     | Unclear | Low | Low     |
| Wu 2020 (48)        | Unclear | Low | Low     | Low     | Low     | Low | Low     |
| Williams 2007 (49)  | Low     | Low | Low     | Low     | Low     | Low | Low     |
| Wang 2017 (50)      | Low     | Low | Low     | Low     | Low     | Low | Low     |
| Wang 2014 (51)      | Low     | Low | Low     | Low     | Low     | Low | Low     |

|                        |         |     |         |         |         |     |         |
|------------------------|---------|-----|---------|---------|---------|-----|---------|
| Wang 2018 (52)         | Unclear | Low | Low     | Low     | Low     | Low | Low     |
| Wang 2017 (53)         | Unclear | Low | Low     | Low     | Low     | Low | Low     |
| Walsh 2016 (54)        | Low     | Low | Unclear | Unclear | Low     | Low | Unclear |
| Vukasovic 2006 (55)    | Unclear | Low | Low     | Low     | Low     | Low | Low     |
| von Recum 2015 (56)    | Low     | Low | Unclear | Unclear | Low     | Low | Unclear |
| Unden 2009 (57)        | Low     | Low | Low     | Low     | Unclear | Low | Low     |
| Tunç 2018 (58)         | Unclear | Low | Low     | Low     | Low     | Low | Low     |
| Tiedt 2017 (59)        | Low     | Low | Low     | Low     | Low     | Low | Low     |
| Tiedt 2020 (60)        | Low     | Low | Low     | Low     | Low     | Low | Low     |
| Tian 2015 (61)         | Low     | Low | Low     | Low     | Low     | Low | Low     |
| Tian 2016 (62)         | Low     | Low | Unclear | Unclear | Low     | Low | Unclear |
| Taema 2014 (63)        | Unclear | Low | High    | Low     | Low     | Low | High    |
| Stejskal 2011 (64)     | High    | Low | Low     | Low     | Low     | Low | Low     |
| Stanca 2015 (65)       | Low     | Low | Low     | Low     | Low     | Low | Low     |
| Stamova 2010 (66)      | Unclear | Low | Unclear | Unclear | Unclear | Low | Unclear |
| Stamova 2019 (67)      | Unclear | Low | Low     | Low     | Low     | Low | Low     |
| Song 2019 (68)         | Unclear | Low | Low     | Low     | Low     | Low | Low     |
| Simats 2020 (69)       | Unclear | Low | Unclear | Unclear | Low     | Low | Unclear |
| Simats 2018 (70)       | Unclear | Low | Unclear | Unclear | Unclear | Low | Unclear |
| Simats 2018 (71)       | Unclear | Low | Unclear | Unclear | Low     | Low | Unclear |
| Sharma 2014 (72)       | Low     | Low | Low     | Low     | Low     | Low | Low     |
| Sharma 2015 (73)       | Unclear | Low | Low     | Low     | Low     | Low | Low     |
| Shaker 2020 (74)       | Unclear | Low | Low     | Low     | Low     | Low | Low     |
| Sepramaniam 2014 (75)  | Unclear | Low | Low     | Low     | Low     | Low | Low     |
| Sayan 2016 (76)        | Low     | Low | Low     | Low     | Low     | Low | Low     |
| Rozanski 2017 (77)     | Low     | Low | Low     | Low     | Low     | Low | Low     |
| Roudbary 2011 (78)     | High    | Low | Low     | Low     | Low     | Low | Low     |
| Rico Santana 2014 (79) | Unclear | Low | Low     | Low     | Low     | Low | Low     |
| Richard 2016 (80)      | Unclear | Low | Low     | Low     | Low     | Low | Low     |

|                      |         |     |         |         |      |     |         |
|----------------------|---------|-----|---------|---------|------|-----|---------|
| Reynolds 2003 (81)   | Low     | Low | Low     | Low     | Low  | Low | Low     |
| Ren 2016 (82)        | High    | Low | Low     | Low     | Low  | Low | Low     |
| Ranga 2016 (83)      | High    | Low | Low     | Low     | High | Low | Low     |
| Rahmati 2020 (84)    | Unclear | Low | Low     | Low     | Low  | Low | Low     |
| Qi 2021 (85)         | Unclear | Low | Low     | Low     | Low  | Low | Low     |
| Peycheva 2021 (86)   | Low     | Low | Low     | Low     | Low  | Low | Low     |
| Perovic 2017 (87)    | Low     | Low | Low     | Low     | Low  | Low | Low     |
| Penn 2018 (88)       | Unclear | Low | Low     | Low     | Low  | Low | Low     |
| Park 2013 (89)       | Low     | Low | Low     | Low     | Low  | Low | Low     |
| Park 2018 (90)       | Low     | Low | Low     | Low     | Low  | Low | Low     |
| Pan 2020 (91)        | High    | Low | Unclear | Low     | High | Low | Unclear |
| Palm 2018 (92)       | Low     | Low | Low     | High    | Low  | Low | Low     |
| Oraby 2019 (93)      | High    | Low | Low     | Low     | Low  | Low | Low     |
| O'Connell 2019 (94)  | Unclear | Low | Low     | Low     | Low  | Low | Low     |
| O'Connell 2019 (95)  | Unclear | Low | Low     | Low     | Low  | Low | Low     |
| O'Connell 2016 (96)  | Unclear | Low | Low     | Low     | Low  | Low | Low     |
| O'Connell 2017 (97)  | Unclear | Low | Low     | Low     | Low  | Low | Low     |
| O'Connell 2017 (98)  | High    | Low | Unclear | Unclear | Low  | Low | Unclear |
| O'Connell 2020 (99)  | Unclear | Low | Low     | Low     | Low  | Low | Low     |
| Nielsen 2020 (100)   | Low     | Low | Low     | Low     | Low  | Low | Low     |
| Nguyen 2020 (101)    | Low     | Low | Low     | Low     | Low  | Low | Low     |
| Nahan 2017 (102)     | High    | Low | Unclear | Unclear | Low  | Low | Unclear |
| Montaner 2012 (103)  | Low     | Low | Low     | Low     | Low  | Low | Low     |
| Menon 2018 (104)     | Low     | Low | Unclear | Unclear | Low  | Low | Unclear |
| Mattila 2021(105)    | Low     | Low | Unclear | Unclear | Low  | Low | Unclear |
| Matsuo 2013 (106)    | Low     | Low | Low     | Low     | Low  | Low | Low     |
| Matsumori 2002 (107) | Low     | Low | Low     | Unclear | Low  | Low | Low     |
| Maly 2021 (108)      | Low     | Low | Unclear | Unclear | Low  | Low | Unclear |
| Mahovic 2013 (109)   | High    | Low | Low     | Low     | Low  | Low | Low     |

|                        |         |     |         |         |         |     |         |
|------------------------|---------|-----|---------|---------|---------|-----|---------|
| Ma 2019 (110)          | Unclear | Low | Low     | Low     | Low     | Low | Low     |
| Luger 2017(111)        | Low     | Low | Low     | Low     | Low     | Low | Low     |
| Lu 2020 (112)          | High    | Low | Low     | Low     | Low     | Low | Low     |
| Long 2013 (113)        | High    | Low | Unclear | Unclear | Low     | Low | Unclear |
| Llombart 2016 (114)    | High    | Low | Low     | Low     | Low     | Low | Low     |
| Liu 2015 (115)         | Low     | Low | Low     | Low     | Low     | Low | Low     |
| Liu 2017 (116)         | High    | Low | Low     | Low     | Low     | Low | Low     |
| Liu 2020 (117)         | High    | Low | Low     | Low     | Low     | Low | Low     |
| Liswati 2009 (118)     | High    | Low | Low     | Low     | Low     | Low | Low     |
| Li 2021 (119)          | Unclear | Low | Low     | Low     | Low     | Low | Low     |
| Li 2015 (120)          | High    | Low | Low     | Low     | Low     | Low | Low     |
| Li 2018 (121)          | Low     | Low | Low     | Low     | Low     | Low | Low     |
| Leung 2014 (122)       | Low     | Low | Low     | Low     | Low     | Low | Low     |
| Laterza 2006 (123)     | High    | Low | Unclear | Unclear | Unclear | Low | Unclear |
| Laskowitz 2009 (124)   | Low     | Low | Low     | Low     | Low     | Low | Low     |
| Kokocinska 2007 (125)  | High    | Low | Low     | Low     | Low     | Low | Low     |
| Kokocinska 2005 (126)  | High    | Low | Low     | Low     | Low     | Low | Low     |
| Kodali 2013 (127)      | High    | Low | Unclear | Unclear | Unclear | Low | Unclear |
| Kodali 2012 (128)      | High    | Low | Unclear | Unclear | Unclear | Low | Unclear |
| Kochanowski 2012 (129) | High    | Low | Low     | Low     | High    | Low | Low     |
| Kavalci 2011 (130)     | Low     | Low | Unclear | Unclear | Low     | Low | Unclear |
| Katsanos 2017 (131)    | Low     | Low | Unclear | Unclear | Low     | Low | Unclear |
| Kashyap 2009 (132)     | High    | Low | Low     | Low     | Low     | Low | Low     |
| Kara 2014 (133)        | Low     | Low | Low     | Low     | Low     | Low | Low     |
| Kalra 2021 (134)       | Low     | Low | Low     | Low     | Low     | Low | Low     |
| Kalani 2020 (135)      | Low     | Low | Low     | Low     | Low     | Low | Low     |
| Jin 2017 (136)         | High    | Low | Low     | Low     | Low     | Low | Low     |
| Jiang 2011 (137)       | High    | Low | Low     | Low     | Low     | Low | Low     |

|                         |         |      |         |         |         |     |         |
|-------------------------|---------|------|---------|---------|---------|-----|---------|
| Jia 2015 (138)          | Low     | Low  | Low     | Low     | Low     | Low | Low     |
| Ji 2016 (139)           | Unclear | Low  | Low     | Low     | Low     | Low | Low     |
| Inoue 2019 (140)        | Low     | Low  | Low     | Low     | Low     | Low | Low     |
| Iltumur 2006 (141)      | High    | Low  | Low     | Low     | Low     | Low | Low     |
| Herisson 2010 (142)     | Low     | Low  | Low     | Low     | Low     | Low | Low     |
| Han 2012 (143)          | High    | Low  | Low     | Low     | Low     | Low | Low     |
| Gunduz 2008 (144)       | High    | Low  | Low     | Low     | Low     | Low | Low     |
| Gunaydin 2014 (145)     | Low     | Low  | Low     | Low     | Low     | Low | Low     |
| Glickman 2011 (146)     | High    | Low  | Low     | Low     | Low     | Low | Low     |
| Giannopoulos 2008 (147) | High    | Low  | Low     | Low     | Low     | Low | Low     |
| Garlichs 2003 (148)     | High    | Low  | Low     | Low     | Low     | Low | Low     |
| Foerch 2012 (149)       | Low     | Low  | Low     | Low     | Low     | Low | Low     |
| Foerch 2006 (150)       | Low     | Low  | Low     | Low     | Low     | Low | Low     |
| Fiszer 1998 (151)       | High    | Low  | Low     | Low     | Low     | Low | Low     |
| Fassbender 1997 (152)   | Low     | Low  | Low     | Low     | Low     | Low | Low     |
| Fang 2018 (153)         | Low     | Low  | Unclear | Unclear | Low     | Low | Unclear |
| Ewida 2021 (154)        | Low     | Low  | Low     | Low     | Low     | Low | Low     |
| Ekingen 2017 (155)      | Low     | Low  | Unclear | Unclear | Low     | Low | Unclear |
| Dvorak 2009 (156)       | Low     | Low  | Low     | Low     | Unclear | Low | Low     |
| Duan 2015 (157)         | Low     | Low  | Low     | Low     | Low     | Low | Low     |
| De Marchis 2018 (158)   | Low     | Low  | Low     | Low     | Low     | Low | Low     |
| Dassan 2012 (159)       | Low     | Low  | Low     | Low     | Low     | Low | Low     |
| Dambinova 2003 (160)    | High    | Low  | Low     | Low     | Low     | Low | Low     |
| Dambinova 2012 (161)    | Low     | Low  | Low     | Low     | Low     | Low | Low     |
| Cheng 2018 (162)        | Low     | Low  | Low     | Low     | Low     | Low | Low     |
| Chen 2018 (163)         | Low     | Low  | Low     | Low     | Unclear | Low | Low     |
| Cavrak 2021 (164)       | High    | High | Low     | Low     | Low     | Low | Low     |
| Cano 2003 (165)         | Low     | Low  | Low     | Low     | Low     | Low | Low     |

|                          |         |     |         |         |      |     |         |
|--------------------------|---------|-----|---------|---------|------|-----|---------|
| Cakmak 2014 (166)        | Low     | Low | Low     | Low     | Low  | Low | Low     |
| Büttner 1997 (167)       | High    | Low | Low     | Low     | High | Low | Low     |
| Bustamante 2021 (168)    | Low     | Low | Low     | Low     | Low  | Low | Low     |
| Bustamante 2017 (169)    | Low     | Low | Low     | Low     | Low  | Low | Low     |
| Bolayir 2019 (170)       | Low     | Low | Low     | Low     | Low  | Low | Low     |
| Bibl 2012 (171)          | Unclear | Low | Low     | Low     | Low  | Low | Low     |
| Barr 2010 (172)          | High    | Low | Low     | Low     | Low  | Low | Low     |
| Azarpazhoooh 2010 (173)  | High    | Low | Low     | Low     | Low  | Low | Low     |
| Atik 2016 (174)          | Low     | Low | Low     | Low     | Low  | Low | Low     |
| Alvarez-Perez 2011 (175) | Low     | Low | Unclear | Unclear | Low  | Low | Unclear |
| Allard 2004 (176)        | Low     | Low | Low     | Low     | Low  | Low | Low     |
| Allard 2005 (177)        | Low     | Low | Low     | High    | Low  | Low | Low     |
| Algin 2019 (178)         | Low     | Low | Low     | Low     | Low  | Low | Low     |
| Algawwam 2021 (179)      | Low     | Low | Unclear | Unclear | Low  | Low | Unclear |
| Ahn 2011 (180)           | Low     | Low | Low     | Low     | Low  | Low | Low     |
| Sadik 2021 (181)         | Low     | Low | Low     | Low     | Low  | Low | Low     |
| Abe 2020 (182)           | Low     | Low | Low     | Unclear | Low  | Low | Unclear |



**Supplementary Table 7: Characteristics of included 10 studies for diagnostic meta-analysis**

| Study ID             | Study design       | Group              | Sample size | Age mean±SD/IQR                | Sex male (%)                 | Setting                 | Reference | Specimen | Assay                               | Time point | Comparison      | HS medium (IQR)        | IS medium (IQR)        | TP | FP | FN | TN  | Sensitivity | Specificity | Cut-off value | Unit  |
|----------------------|--------------------|--------------------|-------------|--------------------------------|------------------------------|-------------------------|-----------|----------|-------------------------------------|------------|-----------------|------------------------|------------------------|----|----|----|-----|-------------|-------------|---------------|-------|
| Dvorak 2009(156)     | Prospective study  | IS 22, HS 17       | 39          | HS 62 (60-70), IS 75 (61- 83)  | HS 10 (55.6%), IS 25(55.6%)  | NA                      | CT; MRI   | serum    | ELISA                               | 3h         | HS vs. IS       | 0.1 (0-0.47)           | 0 (0-0)                | 11 | 0  | 6  | 22  | 65%         | 100%        | 0.03          | ug/l  |
| Rozanski 2017(77)    | Prospective study  | IS 49, HS (ICH) 25 | 74          | IS 75±10, HS 69±11             | not stated                   | Stroke Emergency Mobile | CT        | plasma   | ELISA                               | 3h         | HS vs. IS       | 0.057 (0-1.426)        | 0 (0-0)                | 9  | 0  | 16 | 49  | 36%         | 100%        | 0.29          | ng/ml |
| Mattila 2021(105)    | Prospective study  | IS 178, HS 59      | 237         | IS 70 (61-80), HS 67 (57-76)   | IS 111 (54.7), HS 38 (63.3)  | ED                      | NA        | plasma   | Single-molecule array               | 3h         | HS vs. IS       | 0.4681 (0.1977-1.1882) | 0.1782 (0.0997-0.2951) | 57 | 57 | 2  | 121 | 96.6%       | 68%         | 410           | pg/ml |
| Foerch 2012(149)     | Prospective study  | IS 163, HS 39      | 202         | IS 75.3±13.4, HS 70.7±17.4     | IS 79 (48.5%), HS 21 (55.3%) | Stroke centre           | CT; MRI   | plasma   | Electrochemiluminescent immunoassay | 4.5h       | HS vs. IS       | 1.91 (0.41-17.66)      | 0.08 (0.02-0.14)       | 33 | 6  | 6  | 157 | 84.2%       | 96.3%       | 0.29          | ug/l  |
| Foerch 2012(149)     | Prospective study  | IS 163, HS 39      | 202         | IS 75.3±13.4, HS 70.7±17.4     | IS 79 (48.5%), HS 21 (55.3%) | Stroke centre           | CT; MRI   | plasma   | Electrochemiluminescent immunoassay | 4.5h       | HS vs. IS       | 1.91 (0.41-17.66)      | 0.08 (0.02-0.14)       | 29 | 2  | 10 | 161 | 73.7%       | 98.8%       | 0.5           | ug/l  |
| Foerch 2012(149)     | Prospective study  | IS 163, HS 39      | 202         | IS 75.3±13.4, HS 70.7±17.4     | IS 79 (48.5%), HS 21 (55.3%) | Stroke centre           | CT; MRI   | plasma   | Electrochemiluminescent immunoassay | 4.5h       | HS vs. IS       | 1.91 (0.41-17.66)      | 0.08 (0.02-0.14)       | 24 | 0  | 15 | 163 | 60.5%       | 100%        | 1             | ug/l  |
| Bustamante 2021(168) | Prospective study  | IS 154, HS 35      | 189         | IS 81 (70-85), HS 82 (72-85.5) | IS 64 (41.6), HS 20 (57.1)   | ED                      | CT; MRI   | plasma   | ELISA                               | 4.5h       | HS vs. IS       | 0.045 (0.045-0.059)    | error                  | 34 | 97 | 1  | 57  | 99.4%       | 37.1%       | 0.05          | ng/ml |
| Ren 2016(82)         | Case control study | ICH 45, IS 79      | 124         | ICH 58.91±12.18, IS 61.1±13.33 | ICH 36 (80%), IS 49 (62.02%) | ED                      | CT; MRI   | serum    | ELISA                               | 4.5h       | HS (ICH) vs. IS | 0.81 (0.18-3.31)       | 0.02 (0.004-0.08)      | 27 | 3  | 18 | 76  | 61%         | 96%         | 0.34          | ng/ml |
| Dvorak 2009(156)     | Prospective study  | IS 39, HS 14       | 53          | HS 62 (60-70), IS 75 (61- 83)  | HS 10 (55.6%), IS 25(55.6%)  | NA                      | CT; MRI   | serum    | ELISA                               | 6h         | HS vs. IS       | 0.55 (0-1.3)           | 0 (0-0)                | 10 | 4  | 4  | 35  | 71%         | 95%         | 0.11          | ug/l  |

|                    |                    |                    |     |                                  |                               |                     |         |        |                |     |                 |                       |                       |    |    |    |     |        |        |      |       |
|--------------------|--------------------|--------------------|-----|----------------------------------|-------------------------------|---------------------|---------|--------|----------------|-----|-----------------|-----------------------|-----------------------|----|----|----|-----|--------|--------|------|-------|
| Foerch 2006(150)   | Prospective study  | HS 42, IS 93       | 135 | HS 67±11, IS 70±12               | HS 28 (66.7%), IS 57 (61.3%)  | stroke unit or NICU | CT; MRI | serum  | ELISA          | 6h  | HS vs. IS       | 0.011 (range 0-3.096) | 0 (0-0.014)           | 33 | 2  | 9  | 91  | 79%    | 98%    | 2.9  | ng/l  |
| Katsanos 2017(131) | Prospective study  | IS 121, ICH 31     | 152 | IS 77.3±9.1, ICH 74.0±9.6        | IS 62 (51.2%), ICH 17 (50.0%) | ED                  | NA      | plasma | BAT GFAP assay | 6h  | HS (ICH) vs. IS | 2.17 (0.55-10.12)     | 0.11 (0-0.27)         | 24 | 4  | 7  | 117 | 91%    | 97%    | 0.43 | ng/ml |
| Xiong 2015(47)     | Prospective study  | IS 65, HS (ICH) 43 | 108 | HS 68.7 ±11.2, IS 70.9 ±9.6      | HS 28 (65.1%), IS 44 (67.7%)  | NA                  | CT; MRI | serum  | ELISA          | 6h  | HS (ICH) vs. IS | 1.6±0.8 (mean±SD)     | 0.6±0.4 (mean±SD)     | 37 | 15 | 6  | 50  | 86.0 % | 76.9 % | 0.7  | ng/ml |
| Uden 2009(57)      | Prospective study  | IS 83, HS (ICH) 14 | 97  | IS 75 (63.80), HS 64 (60.75)     | not stated                    | NA                  | CT      | NA     | ELISA          | 24h | IS vs. HS (ICH) | 0.055 (0.040-0.160)   | <0.030 (<0.030-0.070) | 11 | 30 | 3  | 53  | 79%    | 64%    | 40   | ng/l  |
| Ren 2016(82)       | Case control study | ICH 45, IS 79      | 124 | ICH 58.91 ±12.18, IS 61.1 ±13.33 | ICH 36 (80%), IS 49 (62.02%)  | ED                  | CT; MRI | serum  | ELISA          | 24h | HS (ICH) vs. IS | 0.81 (0.18-3.31)      | 0.02 (0.004-0.08)     | 30 | 7  | 15 | 72  | 67%    | 91%    | 0.34 | ng/ml |

## References

1. Zhou X, Qi L. miR-124 Is Downregulated in Serum of Acute Cerebral Infarct Patients and Shows Diagnostic and Prognostic Value. Clin Appl Thromb Hemost 2021;27:10760296211035446.
2. Zhang J, Yang J, Hu J, Zhao W. Clinical value of serum JKAP in acute ischemic stroke patients. Journal of Clinical Laboratory Analysis 2022;36.
3. Yang J, Hao J, Lin Y, Guo Y, Liao K, Yang M, et al. Profile and Functional Prediction of Plasma Exosome-Derived CircRNAs From Acute Ischemic Stroke Patients. Front Genet 2022;13:810974.
4. Turek-Jakubowska A, Debski J, Jakubowski M, Szahidewicz-Krupska E, Gawrys J, Gawrys K, et al. New Candidates for Biomarkers and Drug Targets of Ischemic Stroke-A First Dynamic LC-MS Human Serum Proteomic Study. J Clin Med 2022;11.
5. Tian C, Li Z, Li S, Zhang L, Dai D, Huang Q, et al. The Diagnostic Value of Whole Blood lncRNA NR\_120420 for Acute Ischemic Stroke. Oxid Med Cell Longev 2022;2022:1167394.
6. Rahmati M, Ferns GA, Mobarra N. The lower expression of circulating miR-210 and elevated serum levels of HIF-1alpha in ischemic stroke; Possible markers for diagnosis and disease prediction. J Clin Lab Anal 2021;35:e24073.
7. Li G, Han C, Xia X, Yao S. Relationship of uric acid, C-reactive protein, and N-terminal pro-B-type natriuretic peptide with acute cerebral infarction. Revista da Associação Médica Brasileira 2021;67:1639-43.

8. Induruwa I, McKinney H, Kempster C, Thomas P, Batista J, Malcor JD, et al. Platelet surface receptor glycoprotein VI-dimer is overexpressed in stroke: The Glycoprotein VI in Stroke (GYPSIE) study results. *PLoS One* 2022;17:e0262695.
9. Gawryś K, Turek-Jakubowska A, Gawryś J, Jakubowski M, Dębski J, Szahidewicz-Krupska E, et al. Platelet-Derived Drug Targets and Biomarkers of Ischemic Stroke—The First Dynamic Human LC-MS Proteomic Study. *Journal of Clinical Medicine* 2022;11.
10. Cho YE, Lee H, Bae HR, Kim H, Yun S, Vorn R, et al. Circulating immune cell landscape in patients who had mild ischaemic stroke. *Stroke Vasc Neurol* 2022.
11. Intiso D, Zarrelli MM, Lagioia G, Di Rienzo F, Checchia De Ambrosio C, Simone P, et al. Tumor necrosis factor alpha serum levels and inflammatory response in acute ischemic stroke patients. *Neurological Sciences* 2004;24:390-6.
12. F. Perini MM, M. Alecci, E. Galloni, M. Marchi, V. Toso. Temporal profile of serum anti-inflammatory and pro-inflammatory interleukins in acute ischemic stroke patients. *Neurol Sci* 2001.
13. Pedersen ED, Waje-Andreassen U, Vedeler CA, Aamodt G, Mollnes TE. Systemic complement activation following human acute ischaemic stroke. *Clinical and Experimental Immunology* 2004;137:117-22.
14. Nayak AR, Kashyap RS, Kabra D, Purohit HJ, Taori GM, Dagainawala HF. Prognostic significance of ischemia-modified albumin in acute ischemic stroke patients: A preliminary study. *Ann Neurosci* 2011;18:5-7.
15. Mehmet Senes NK, Ozlem Coskun, Oguzhan Zengi, Levent Inan and Dogan Yucel. Oxidative and nitrosative stress in acute ischaemic stroke. *Ann Clin Biochem* 2007;44:43-7.
16. Feng L, Guo J, Ai F. Circulating long noncoding RNA ANRIL downregulation correlates with increased risk, higher disease severity and elevated pro-inflammatory cytokines in patients with acute ischemic stroke. *J Clin Lab Anal* 2019;33:e22629.
17. A. Blann PK, J.Krupinski, C. Soluble intercellular adhesion molecule-1, E-selectin, vascular cell adhesion molecule-1 and von Willebrand factor in stroke. *Blood Coagulation and Fibrinolysis* 1999;10:277-84.
18. Kou-Gi Shyu HC, Cheng-Chung Lin. Serum levels of intercellular adhesion molecule-1 and E-selectin in patients with acute ischaemic stroke. *J Neurol* 1997;244:90-3.
19. Liu P, Xiang JW, Jin SX. Serum CXCL12 levels are associated with stroke severity and lesion volumes in stroke patients. *Neurol Res* 2015;37:853-8.
20. Supanc V, Biloglav Z, Kes VB, Demarin V. Role of cell adhesion molecules in acute ischemic stroke. *Ann Saudi Med* 2011;31:365-70.
21. Wunderlich MT, Hanhoff T, Goertler M, Spener F, Glatz JF, Wallesch CW, et al. Release of brain-type and heart-type fatty acid-binding proteins in serum after acute ischaemic stroke. *J Neurol* 2005;252:718-24.
22. Hu Z, Zhu Z, Cao Y, Wang L, Sun X, Dong J, et al. Rapid and Sensitive Differentiating Ischemic and Hemorrhagic Strokes by Dried Blood Spot Based Direct Injection Mass Spectrometry Metabolomics Analysis. *J Clin Lab Anal* 2016;30:823-30.
23. M Uno KTK, K Nishi, H Itabe, S Nagahiro. Raised plasma oxidised LDL in acute cerebral infarction. *J Neurol Neurosurg Psychiatry* 2003;74:312–6.
24. Sun D, Tiedt S, Yu B, Jian X, Gottesman RF, Mosley TH, et al. A prospective study of serum metabolites and risk of ischemic stroke. *Neurology* 2019;92:e1890-e8.

25. Jae Woo Song KSS, Jong Rak Choi, Shin Young Kim, Ji-Hyuk Rhee. Plasma level of IL-6 and its relationship to procoagulant and fibrinolytic markers in acute ischemic stroke. *Yonsei Med J* 2006;47:201-6.
26. Zitnanova I, Siarnik P, Kollar B, Chomova M, Pazderova P, Andrezalova L, et al. Oxidative Stress Markers and Their Dynamic Changes in Patients after Acute Ischemic Stroke. *Oxid Med Cell Longev* 2016;2016:9761697.
27. Can S, Akdur O, Yildirim A, Adam G, Cakir DU, Karaman HI. Myelin basic protein and ischemia modified albumin levels in acute ischemic stroke cases. *Pak J Med Sci* 2015;31:1110-4.
28. Kimberly WT, Wang Y, Pham L, Furie KL, Gerszten RE. Metabolite profiling identifies a branched chain amino acid signature in acute cardioembolic stroke. *Stroke* 2013;44:1389-95.
29. Abboud H, Labreuche J, Meseguer E, Lavalley PC, Simon O, Olivot JM, et al. Ischemia-modified albumin in acute stroke. *Cerebrovasc Dis* 2007;23:216-20.
30. Tang Y, Xu H, Du X, Lit L, Walker W, Lu A, et al. Gene expression in blood changes rapidly in neutrophils and monocytes after ischemic stroke in humans: a microarray study. *J Cereb Blood Flow Metab* 2006;26:1089-102.
31. Rainer TH, Wong KS, Lam W, Lam NY, Graham CA, Lo YM. Comparison of plasma beta-globin DNA and S-100 protein concentrations in acute stroke. *Clin Chim Acta* 2007;376:190-6.
32. Tiedt S, Duering M, Barro C, Kaya AG, Boeck J, Bode FJ, et al. Serum neurofilament light: A biomarker of neuroaxonal injury after ischemic stroke. *Neurology* 2018;91:e1338-e47.
33. Xiaoqi Zhu JD, Beiyun Wang, Jie Wang, Min Xu. Circular RNA DLGAP4 is down-regulated and negatively correlates with severity, inflammatory cytokine expression and pro-inflammatory gene miR-143 expression in acute ischemic stroke patients. *Int J Clin Exp Pathol* 2019;12:941-8.
34. Zhu M, Li N, Luo P, Jing W, Wen X, Liang C, et al. Peripheral Blood Leukocyte Expression of lncRNA MIAT and Its Diagnostic and Prognostic Value in Ischemic Stroke. *J Stroke Cerebrovasc Dis* 2018;27:326-37.
35. Zhou S, Bao J, Wang Y, Pan S. S100beta as a biomarker for differential diagnosis of intracerebral hemorrhage and ischemic stroke. *Neurol Res* 2016;38:327-32.
36. Zhou J, Chen L, Chen B, Huang S, Zeng C, Wu H, et al. Increased serum exosomal miR-134 expression in the acute ischemic stroke patients. *BMC Neurol* 2018;18:198.
37. Zhou X, Xu C, Chao D, Chen Z, Li S, Shi M, et al. Acute Cerebral Ischemia Increases a Set of Brain-Specific miRNAs in Serum Small Extracellular Vesicles. *Front Mol Neurosci* 2022;15:874903.
38. Zhao X, Yu Y, Xu W, Dong L, Wang Y, Gao B, et al. Apolipoprotein A1-Unique Peptide as a Diagnostic Biomarker for Acute Ischemic Stroke. *Int J Mol Sci* 2016;17:458.
39. Zhao H, Li G, Ma Q, Tao Z, Wang R, Fan Z, et al. MicroRNA-99a-5p in circulating immune cells as a potential biomarker for the early diagnosis of ischemic stroke. *Brain Circ* 2017;3:21-8.
40. Zhao B, Zhu Z, Hao J, Wan Z, Guo X. Decreased plasma miR-335 expression in patients with acute ischemic stroke and its association with calmodulin expression. *J Int Med Res* 2016;44:1331-8.

41. Zhang X, Li Y, Liang Y, Sun P, Wu X, Song J, et al. Distinguishing Intracerebral Hemorrhage from Acute Cerebral Infarction through Metabolomics. *Rev Invest Clin* 2017;69:319-28.
42. Zhang H, Chen G, Qiu W, Pan Q, Chen Y, Chen Y, et al. Plasma endothelial microvesicles and their carrying miRNA-155 serve as biomarkers for ischemic stroke. *J Neurosci Res* 2020;98:2290-301.
43. Jarosław Zaremba JL. Interleukin-12 in acute ischemic stroke patients. *Folia Neuropathol* 2006.
44. Yuan Z, Yu Z, Zhang Y, Yang H. Analysis of the Clinical Diagnostic Value of GMFB in Cerebral Infarction. *Curr Pharm Biotechnol* 2020;21:955-63.
45. Yigit I, Atescelik M, Yilmaz M, Goktekin MC, Gurger M, Ilhan N. Investigation of UCH-L1 levels in ischemic stroke, intracranial hemorrhage and metabolic disorder induced impaired consciousness. *Am J Emerg Med* 2017;35:1895-8.
46. Yang ZB, Li TB, Zhang Z, Ren KD, Zheng ZF, Peng J, et al. The Diagnostic Value of Circulating Brain-specific MicroRNAs for Ischemic Stroke. *Intern Med* 2016;55:1279-86.
47. Xiong L, Yang Y, Zhang M, Xu W. The use of serum glial fibrillary acidic protein test as a promising tool for intracerebral hemorrhage diagnosis in Chinese patients and prediction of the short-term functional outcomes. *Neurol Sci* 2015;36:2081-7.
48. Wu X, Zhang X, Li D, Zhu Z. Plasma level of miR-99b may serve as potential diagnostic and short-term prognostic markers in patients with acute cerebral infarction. *J Clin Lab Anal* 2020;34:e23093.
49. Williams JB, Jauch EC, Lindsell CJ, Campos B. Endothelial microparticle levels are similar in acute ischemic stroke and stroke mimics due to activation and not apoptosis/necrosis. *Acad Emerg Med* 2007;14:685-90.
50. Wang Y, Ma Z, Kan P, Zhang B. The Diagnostic Value of Serum miRNA-221-3p, miRNA-382-5p, and miRNA-4271 in Ischemic Stroke. *J Stroke Cerebrovasc Dis* 2017;26:1055-60.
51. Wang W, Sun G, Zhang L, Shi L, Zeng Y. Circulating microRNAs as novel potential biomarkers for early diagnosis of acute stroke in humans. *J Stroke Cerebrovasc Dis* 2014;23:2607-13.
52. Wang W, Li DB, Li RY, Zhou X, Yu DJ, Lan XY, et al. Diagnosis of Hyperacute and Acute Ischaemic Stroke: The Potential Utility of Exosomal MicroRNA-21-5p and MicroRNA-30a-5p. *Cerebrovasc Dis* 2018;45:204-12.
53. Wang J, Zhao H, Fan Z, Li G, Ma Q, Tao Z, et al. Long Noncoding RNA H19 Promotes Neuroinflammation in Ischemic Stroke by Driving Histone Deacetylase 1-Dependent M1 Microglial Polarization. *Stroke* 2017;48:2211-21.
54. Walsh KB, Hart K, Roll S, Sperling M, Unruh D, Davidson WS, et al. Apolipoprotein A-I and Paraoxonase-1 Are Potential Blood Biomarkers for Ischemic Stroke Diagnosis. *J Stroke Cerebrovasc Dis* 2016;25:1360-5.
55. Vukasovic I, Tesija-Kuna A, Topic E, Supanc V, Demarin V, Petrovic M. Matrix metalloproteinases and their inhibitors in different acute stroke subtypes. *Clin Chem Lab Med* 2006;44:428-34.
56. von Recum J, Searle J, Slagman A, Vollert JO, Endres M, Mockel M, et al. Copeptin: Limited Usefulness in Early Stroke Differentiation? *Stroke Res Treat* 2015;2015:768401.
57. Unden J, Strandberg K, Malm J, Campbell E, Rosengren L, Stenflo J, et al. Explorative investigation of biomarkers of brain damage and coagulation system activation in clinical stroke differentiation. *J Neurol* 2009;256:72-7.

58. Abdulkadir Tunç DK, Mehmet Akdoğan, Saadet Sayan. Serum prolidase enzyme activity as a diagnostic marker for acute ischemic stroke. *Biomedical Research* 2018;29:1137-42.
59. Tiedt S, Prestel M, Malik R, Schieferdecker N, Duering M, Kautzky V, et al. RNA-Seq Identifies Circulating miR-125a-5p, miR-125b-5p, and miR-143-3p as Potential Biomarkers for Acute Ischemic Stroke. *Circ Res* 2017;121:970-80.
60. Tiedt S, Brandmaier S, Kollmeier H, Duering M, Artati A, Adamski J, et al. Circulating Metabolites Differentiate Acute Ischemic Stroke from Stroke Mimics. *Ann Neurol* 2020;88:736-46.
61. Tian D, Zhang S, He X, Liu H. Serum procalcitonin as a diagnostic marker in acute ischemic stroke. *Neuroreport* 2015;26:33-7.
62. Tian C, Li Z, Yang Z, Huang Q, Liu J, Hong B. Plasma MicroRNA-16 Is a Biomarker for Diagnosis, Stratification, and Prognosis of Hyperacute Cerebral Infarction. *PLoS One* 2016;11:e0166688.
63. Mohamed A. Shoaeb MAS, Khaled M. Taema, Mohamed A. Hammouda. C-reactive protein A potential biomarker for differentiating ischemic from hemorrhagic stroke. *Egypt J Neurol Psychiat Neurosurg* 2014;51:311-20.
64. Stejskal D, Sporova L, Svestak M, Karpisek M. Determination of serum visinin like protein-1 and its potential for the diagnosis of brain injury due to the stroke: a pilot study. *Biomed Pap Med Fac Univ Palacky Olomouc Czech Repub* 2011;155:263-8.
65. Stanca DM, Marginean IC, Soritau O, Dragos C, Marginean M, Muresanu DF, et al. GFAP and antibodies against NMDA receptor subunit NR2 as biomarkers for acute cerebrovascular diseases. *J Cell Mol Med* 2015;19:2253-61.
66. Stamova B, Xu H, Jickling G, Bushnell C, Tian Y, Ander BP, et al. Gene expression profiling of blood for the prediction of ischemic stroke. *Stroke* 2010;41:2171-7.
67. Stamova B, Ander BP, Jickling G, Hamade F, Durocher M, Zhan X, et al. The intracerebral hemorrhage blood transcriptome in humans differs from the ischemic stroke and vascular risk factor control blood transcriptomes. *J Cereb Blood Flow Metab* 2019;39:1818-35.
68. Song H, Zhou H, Qu Z, Hou J, Chen W, Cai W, et al. From Analysis of Ischemic Mouse Brain Proteome to Identification of Human Serum Clusterin as a Potential Biomarker for Severity of Acute Ischemic Stroke. *Transl Stroke Res* 2019;10:546-56.
69. Simats A, Ramiro L, Garcia-Berrocoso T, Brioso F, Gonzalo R, Martin L, et al. A Mouse Brain-based Multi-omics Integrative Approach Reveals Potential Blood Biomarkers for Ischemic Stroke. *Mol Cell Proteomics* 2020;19:1921-36.
70. Simats A, Garcia-Berrocoso T, Ramiro L, Giralt D, Gill N, Penalba A, et al. Characterization of the rat cerebrospinal fluid proteome following acute cerebral ischemia using an aptamer-based proteomic technology. *Sci Rep* 2018;8:7899.
71. Simats A, Garcia-Berrocoso T, Penalba A, Giralt D, Llovera G, Jiang Y, et al. CCL23: a new CC chemokine involved in human brain damage. *J Intern Med* 2018;283:461-75.
72. Sharma R, Macy S, Richardson K, Lokhnygina Y, Laskowitz DT. A blood-based biomarker panel to detect acute stroke. *J Stroke Cerebrovasc Dis* 2014;23:910-8.
73. Sharma R, Gowda H, Chavan S, Advani J, Kelkar D, Kumar GS, et al. Proteomic Signature of Endothelial Dysfunction Identified in the Serum of Acute Ischemic Stroke Patients by the iTRAQ-Based LC-MS Approach. *J Proteome Res* 2015;14:2466-79.
74. MARYAM EMAD SHAKER DZAL. Serum glycogen phosphorylase BB (GPBB) level and Prolidase activity as markers in diagnosis of ischemic stroke. *International Journal of Pharmaceutical Research* 2020;12.

75. Sepramaniam S, Tan JR, Tan KS, DeSilva DA, Tavintharan S, Woon FP, et al. Circulating microRNAs as biomarkers of acute stroke. *Int J Mol Sci* 2014;15:1418-32.
76. Sayan S, Kotan D. Levels of brain natriuretic peptide as a marker for the diagnosis and prognosis of acute ischemic stroke. *Arch Med Sci Atheroscler Dis* 2016;1:e16-e22.
77. Rozanski M, Waldschmidt C, Kunz A, Grittner U, Ebinger M, Wendt M, et al. Glial Fibrillary Acidic Protein for Prehospital Diagnosis of Intracerebral Hemorrhage. *Cerebrovasc Dis* 2017;43:76-81.
78. Seyed Ali Roudbary FS, Kambiz Forghanparast, and Reza Sohrabnejad. Serum C-reactive protein level as a biomarker for differentiation of ischemic from hemorrhagic stroke. *Acta Medica Iranica* 2011;49:149-52.
79. Rico Santana N, Zapico Muniz E, Cocho D, Bravo Y, Delgado Mederos R, Marti-Fabregas J. Analysis of peptidome profiling of serum from patients with early onset symptoms of ischemic stroke. *J Stroke Cerebrovasc Dis* 2014;23:235-40.
80. Richard S, Lapierre V, Girerd N, Bonnerot M, Burkhard PR, Lagerstedt L, et al. Diagnostic performance of peroxiredoxin 1 to determine time-of-onset of acute cerebral infarction. *Sci Rep* 2016;6:38300.
81. Mark A. Reynolds HJK, Jeffrey R. Dahlen, Joseph M. Anderberg. Early Biomarkers of Stroke. *Clinical Chemistry* 2003.
82. Ren C, Kobeissy F, Alawieh A, Li N, Li N, Zibara K, et al. Assessment of Serum UCH-L1 and GFAP in Acute Stroke Patients. *Sci Rep* 2016;6:24588.
83. GS Ranga NB, SB Sharma, R Avasthi. Human carcinoembryonic antigen is a useful biomarker for diagnosis of acute ischemic stroke - A pilot study. *Neurology Asia* 2016;21:1-6.
84. Rahmati M, Azarpazhooh MR, Ehteram H, Ferns GA, Ghayour-Mobarhan M, Ghannadan H, et al. The elevation of S100B and downregulation of circulating miR-602 in the sera of ischemic stroke (IS) patients: the emergence of novel diagnostic and prognostic markers. *Neurol Sci* 2020;41:2185-92.
85. Qi Y, Yuan M, Yi Q, Wang Y, Xu L, Xu C, et al. A panel of two miRNAs correlated to systolic blood pressure is a good diagnostic indicator for stroke. *Biosci Rep* 2021;41.
86. Peycheva M, Deneva T, Zahariev Z. The role of fibrinogen in acute ischaemic stroke. *Neurol Neurochir Pol* 2021;55:74-80.
87. Perovic E, Mrdjen A, Harapin M, Tesija Kuna A, Simundic AM. Diagnostic and prognostic role of resistin and copeptin in acute ischemic stroke. *Top Stroke Rehabil* 2017;24:614-8.
88. Penn AM, Saly V, Trivedi A, Lesperance ML, Votova K, Jackson AM, et al. Differential Proteomics for Distinguishing Ischemic Stroke from Controls: a Pilot Study of the SpecTRA Project. *Transl Stroke Res* 2018;9:590-9.
89. Park SY, Kim MH, Kim OJ, Ahn HJ, Song JY, Jeong JY, et al. Plasma heart-type fatty acid binding protein level in acute ischemic stroke: comparative analysis with plasma S100B level for diagnosis of stroke and prediction of long-term clinical outcome. *Clin Neurol Neurosurg* 2013;115:405-10.
90. Park KY, Ay I, Avery R, Caceres JA, Siket MS, Pontes-Neto OM, et al. New biomarker for acute ischaemic stroke: plasma glycogen phosphorylase isoenzyme BB. *J Neurol Neurosurg Psychiatry* 2018;89:404-9.
91. Pan X, Hu Z, Qin L, Han Y, Zhu X, Zhou Y, et al. Applying minimal RNA-seq of peripheral blood platelet mRNA to reveal novel biomarkers in male patients with cerebral stroke. *Neuroreport* 2020;31:156-61.

92. Palm F, Pussinen PJ, Safer A, Tervahartiala T, Sorsa T, Urbanek C, et al. Serum matrix metalloproteinase-8, tissue inhibitor of metalloproteinase and myeloperoxidase in ischemic stroke. *Atherosclerosis* 2018;271:9-14.
93. Oraby MI, Rabie RA. Blood biomarkers for stroke: the role of thioredoxin in diagnosis and prognosis of acute ischemic stroke. *The Egyptian Journal of Neurology, Psychiatry and Neurosurgery* 2019;56.
94. O'Connell GC, Treadway MB, Tennant CS, Lucke-Wold N, Chantler PD, Barr TL. Shifts in Leukocyte Counts Drive the Differential Expression of Transcriptional Stroke Biomarkers in Whole Blood. *Transl Stroke Res* 2019;10:26-35.
95. O'Connell GC, Stafford P, Walsh KB, Adeoye O, Barr TL. High-Throughput Profiling of Circulating Antibody Signatures for Stroke Diagnosis Using Small Volumes of Whole Blood. *Neurotherapeutics* 2019;16:868-77.
96. O'Connell GC, Petrone AB, Treadway MB, Tennant CS, Lucke-Wold N, Chantler PD, et al. Machine-learning approach identifies a pattern of gene expression in peripheral blood that can accurately detect ischaemic stroke. *NPJ Genom Med* 2016;1:16038.
97. O'Connell GC, Petrone AB, Tennant CS, Lucke-Wold N, Kabbani Y, Tarabishy AR, et al. Circulating extracellular DNA levels are acutely elevated in ischaemic stroke and associated with innate immune system activation. *Brain Inj* 2017;31:1369-75.
98. O'Connell GC, Chantler PD, Barr TL. Stroke-associated pattern of gene expression previously identified by machine-learning is diagnostically robust in an independent patient population. *Genom Data* 2017;14:47-52.
99. O'Connell GC, Alder ML, Smothers CG, Still CH, Webel AR, Moore SM. Diagnosis of ischemic stroke using circulating levels of brain-specific proteins measured via high-sensitivity digital ELISA. *Brain Res* 2020;1739:146861.
100. Nielsen HH, Soares CB, Hogedal SS, Madsen JS, Hansen RB, Christensen AA, et al. Acute Neurofilament Light Chain Plasma Levels Correlate With Stroke Severity and Clinical Outcome in Ischemic Stroke Patients. *Front Neurol* 2020;11:448.
101. Nguyen TTM, van der Bent ML, Wermer MJH, van den Wijngaard IR, van Zwet EW, de Groot B, et al. Circulating tRNA Fragments as a Novel Biomarker Class to Distinguish Acute Stroke Subtypes. *Int J Mol Sci* 2020;22.
102. Nahan KS, Walsh KB, Adeoye O, Landero-Figueroa JA. The metal and metalloprotein profile of human plasma as biomarkers for stroke diagnosis. *J Trace Elem Med Biol* 2017;42:81-91.
103. Montaner J, Mendioroz M, Delgado P, Garcia-Berrocso T, Giralto D, Merino C, et al. Differentiating ischemic from hemorrhagic stroke using plasma biomarkers: the S100B/RAGE pathway. *J Proteomics* 2012;75:4758-65.
104. Menon B, Ramalingam K, Krishna V. Study of Ischemia Modified Albumin as a Biomarker in Acute Ischaemic Stroke. *Ann Neurosci* 2018;25:187-90.
105. Mattila OS, Ashton NJ, Blennow K, Zetterberg H, Harve-Rytsala H, Pihlasviita S, et al. Ultra-Early Differential Diagnosis of Acute Cerebral Ischemia and Hemorrhagic Stroke by Measuring the Prehospital Release Rate of GFAP. *Clin Chem* 2021;67:1361-72.
106. Ryu Matsuo TA, Masahiro Kamouchi, Junya Kuroda, Takahiro Kuwashiro, Jun Hata, Hiroshi Sugimori, Kenji Fukuda, Seiji Gotoh, Noriko Makihara, Masayo Fukuhara, Hideto Awano,, Tetsu Isomura KS, Masahiro Yasaka, Yasushi Okada, Yutaka Kiyohara and Takanari Kitazono. Clinical significance of plasma VEGF value in ischemic stroke - research for biomarkers in ischemic stroke (REBIOS) study. *BMC Neurology* 2013;13:32.
107. Obata; AMHTJ-e, Ono; STNTK, Ohnishi; MOTMT, Sasayama YDS. Circulating hepatocyte growth factor as a diagnostic marker of thrombus formation in patients with cerebral infarction. *Circ J* 2002;66:216 –8.



108. Maly M, Hajsl M, Bechynska K, Kucerka O, Sramek M, Suttner J, et al. Lipidomic Analysis to Assess Oxidative Stress in Acute Coronary Syndrome and Acute Stroke Patients. *Metabolites* 2021;11.
109. Mahovic D, Zurak N, Lakusic N, Sporis D, Zarkovic N, Stancin N, et al. The dynamics of soluble Fas/APO 1 apoptotic biochemical marker in acute ischemic stroke patients. *Adv Med Sci* 2013;58:298-303.
110. Ma Q, Li G, Tao Z, Wang J, Wang R, Liu P, et al. Blood microRNA-93 as an indicator for diagnosis and prediction of functional recovery of acute stroke patients. *J Clin Neurosci* 2019;62:121-7.
111. Luger S, Witsch J, Dietz A, Hamann GF, Minnerup J, Schneider H, et al. Glial Fibrillary Acidic Protein Serum Levels Distinguish between Intracerebral Hemorrhage and Cerebral Ischemia in the Early Phase of Stroke. *Clin Chem* 2017;63:377-85.
112. Lu D, Ho ES, Mai H, Zang J, Liu Y, Li Y, et al. Identification of Blood Circular RNAs as Potential Biomarkers for Acute Ischemic Stroke. *Front Neurosci* 2020;14:81.
113. Guangwen Long FW, Huaping Li, Zhongwei Yin, Chaugai Sandip, Yan Lou, Yan Wang, Chen Chen, Dao Wen Wang. Circulating miR-30a, miR-126 and let-7b as biomarker for ischemic stroke in humans. *BMC Neurology* 2013;13:178.
114. Llombart V, Garcia-Berrocso T, Bustamante A, Giralt D, Rodriguez-Luna D, Muchada M, et al. Plasmatic retinol-binding protein 4 and glial fibrillary acidic protein as biomarkers to differentiate ischemic stroke and intracerebral hemorrhage. *J Neurochem* 2016;136:416-24.
115. Liu Y, Zhang J, Han R, Liu H, Sun D, Liu X. Downregulation of serum brain specific microRNA is associated with inflammation and infarct volume in acute ischemic stroke. *J Clin Neurosci* 2015;22:291-5.
116. Liu P, Li R, Antonov AA, Wang L, Li W, Hua Y, et al. Discovery of Metabolite Biomarkers for Acute Ischemic Stroke Progression. *J Proteome Res* 2017;16:773-9.
117. Liu J, Sugimoto K, Cao Y, Mori M, Guo L, Tan G. Serum Sphingosine 1-Phosphate (S1P): A Novel Diagnostic Biomarker in Early Acute Ischemic Stroke. *Front Neurol* 2020;11:985.
118. Liswati E, Wijaya A, Ranakusuma TAS. Biochemical Markers for Differential Diagnosis of Stroke: A Biochemical Markers Study of S100B Protein, Neuron Specific Enolase (NSE), Myelin Basic Protein (MBP), and Heart-Type Fatty Acid Binding Protein (H-FABP). *The Indonesian Biomedical Journal* 2009;1.
119. Li X, Xu L, Xu Z. The diagnostic and prognostic performance of Lp-PLA2 in acute ischemic stroke. *Med Clin (Barc)* 2021;156:437-43.
120. Li P, Teng F, Gao F, Zhang M, Wu J, Zhang C. Identification of circulating microRNAs as potential biomarkers for detecting acute ischemic stroke. *Cell Mol Neurobiol* 2015;35:433-47.
121. Li G, Ma Q, Wang R, Fan Z, Tao Z, Liu P, et al. Diagnostic and Immunosuppressive Potential of Elevated Mir-424 Levels in Circulating Immune Cells of Ischemic Stroke Patients. *Aging Dis* 2018;9:172-81.
122. Leung LY, Chan CP, Leung YK, Jiang HL, Abrigo JM, Wang de F, et al. Comparison of miR-124-3p and miR-16 for early diagnosis of hemorrhagic and ischemic stroke. *Clin Chim Acta* 2014;433:139-44.
123. Laterza OF, Modur VR, Crimmins DL, Olander JV, Landt Y, Lee JM, et al. Identification of novel brain biomarkers. *Clin Chem* 2006;52:1713-21.
124. Laskowitz DT, Kasner SE, Saver J, Remmel KS, Jauch EC, Group BS. Clinical usefulness of a biomarker-based diagnostic test for acute stroke: the Biomarker Rapid Assessment in Ischemic Injury (BRAIN) study. *Stroke* 2009;40:77-85.

125. Danuta Kokocińska PW, Robert Partyka, Jerzy Jarząb, Przemysław Jałowiecki & Jerzy Sikora The diagnostic utility of S-100B protein and TPA in patients with ischemic stroke. *Neuroendocrinology Letters* 2007;28:693–8.
126. Danuta Kokocińska PG, Przemysław Jałowiecki, Robert Partyka,, Piotr Wieczorek ŁM, Izabela Chanek, Jerzy Jarząb, Lech Cierpka. The usefulness of assessing the serum levels of S- 100 protein in patients with ischemic stroke. *Acta Angiol* 2005;11:105-13.
127. Kodali P, Landero-Figueroa JA, Caruso J, Adeoye O. A preliminary method development study to identify potential stroke biomarkers in plasma using multiple chromatographies with nanoLC-ESIMS detection. *J Neural Transm (Vienna)* 2013;120:1441-5.
128. Kodali P, Chitta KR, Landero Figueroa JA, Caruso JA, Adeoye O. Detection of metals and metalloproteins in the plasma of stroke patients by mass spectrometry methods. *Metallomics* 2012;4:1077-87.
129. Jan Kochanowski MG, Agnieszka Baranowska-Bik,, Ewa Wolinska-Witort MK, Bogusława Baranowska,,Wojciech Bik. Resistin levels in women with ischemic stroke. *Neuroendocrinol Lett* 2012;33:603-7.
130. Kavalci C GH, Durukan P, Cevik Y. Value of biomarker-based diagnostic test in differential diagnosis of hemorrhagic-ischemic stroke. *Bratisl Lek Listy* 2011;112:398-401.
131. Katsanos AH, Makris K, Stefani D, Koniari K, Gialouri E, Lelekis M, et al. Plasma Glial Fibrillary Acidic Protein in the Differential Diagnosis of Intracerebral Hemorrhage. *Stroke* 2017;48:2586-8.
132. Kashyap RS, Nayak AR, Deshpande PS, Kabra D, Purohit HJ, Taori GM, et al. Inter-alpha-trypsin inhibitor heavy chain 4 is a novel marker of acute ischemic stroke. *Clin Chim Acta* 2009;402:160-3.
133. Kara H, Akinci M, Degirmenci S, Bayir A, Ak A, Nayman A, et al. High-sensitivity C-reactive protein, lipoprotein-related phospholipase A2, and acute ischemic stroke. *Neuropsychiatr Dis Treat* 2014;10:1451-7.
134. Kalra LP, Khatte H, Ramanathan S, Sapehia S, Devi K, Kaliyaperumal A, et al. Serum GFAP for stroke diagnosis in regions with limited access to brain imaging (BE FAST India). *Eur Stroke J* 2021;6:176-84.
135. Kalani MYS, Alsop E, Meechoovet B, Beecroft T, Agrawal K, Whitsett TG, et al. Extracellular microRNAs in blood differentiate between ischaemic and haemorrhagic stroke subtypes. *J Extracell Vesicles* 2020;9:1713540.
136. Jin F, Xing J. Circulating pro-angiogenic and anti-angiogenic microRNA expressions in patients with acute ischemic stroke and their association with disease severity. *Neurol Sci* 2017;38:2015-23.
137. Jiang Z, Sun J, Liang Q, Cai Y, Li S, Huang Y, et al. A metabonomic approach applied to predict patients with cerebral infarction. *Talanta* 2011;84:298-304.
138. Jia L, Hao F, Wang W, Qu Y. Circulating miR-145 is associated with plasma high-sensitivity C-reactive protein in acute ischemic stroke patients. *Cell Biochem Funct* 2015;33:314-9.
139. Ji Q, Ji Y, Peng J, Zhou X, Chen X, Zhao H, et al. Increased Brain-Specific MiR-9 and MiR-124 in the Serum Exosomes of Acute Ischemic Stroke Patients. *PLoS One* 2016;11:e0163645.
140. Inoue T, Ishida T, Inoue T, Saito A, Ezura M, Uenohara H, et al. Lectin-Like Oxidized Low-Density Lipoprotein Receptor-1 Levels as a Biomarker of Acute Intracerebral Hemorrhage. *J Stroke Cerebrovasc Dis* 2019;28:490-4.
141. İltumur K, Yavavli A, Apak I, Aritürk Z, Toprak N. Elevated plasma N-terminal pro-brain natriuretic peptide levels in acute ischemic stroke. *Am Heart J* 2006;151:1115-22.

142. Herisson F, Delaroche O, Auffray-Calvier E, Duport BD, Guillon B. Ischemia-modified albumin and heart fatty acid-binding protein: could early ischemic cardiac biomarkers be used in acute stroke management? *J Stroke Cerebrovasc Dis* 2010;19:279-82.
143. Han K, Jia N, Yang L, Min LQ. Correlation between ischemia-modified albumin and lipid levels in patients with acute cerebrovascular disease. *Mol Med Rep* 2012;6:621-4.
144. Gunduz A, Turedi S, Mentese A, Altunayoglu V, Turan I, Karahan SC, et al. Ischemia-modified albumin levels in cerebrovascular accidents. *Am J Emerg Med* 2008;26:874-8.
145. Gunaydin M, Turkmen S, Sahin A, Sumer A, Mentese A, Turedi S, et al. The diagnostic value of SCUBE1 levels in acute ischemic stroke. *Turkish Journal of Biochemistry* 2014;39:107-12.
146. Glickman SW, Phillips S, Anstrom KJ, Laskowitz DT, Cairns CB. Discriminative capacity of biomarkers for acute stroke in the emergency department. *J Emerg Med* 2011;41:333-9.
147. Sotirios Giannopoulos MK, Apostolos I. Hatzitolios,, Christos G. Savopoulos AZ, Michail Karamouzis. Measurements of endothelin-1, C-reactive protein and fibrinogen plasma levels in patients with acute ischemic stroke. *Neurol Res* 2008;30:727–30.
148. Garlichs CD, Kozina S, Fateh-Moghadam S, Handschu R, Tomandl B, Stumpf C, et al. Upregulation of CD40-CD40 ligand (CD154) in patients with acute cerebral ischemia. *Stroke* 2003;34:1412-8.
149. Foerch C, Niessner M, Back T, Bauerle M, De Marchis GM, Ferbert A, et al. Diagnostic accuracy of plasma glial fibrillary acidic protein for differentiating intracerebral hemorrhage and cerebral ischemia in patients with symptoms of acute stroke. *Clin Chem* 2012;58:237-45.
150. Foerch C, Curdt I, Yan B, Dvorak F, Hermans M, Berkefeld J, et al. Serum glial fibrillary acidic protein as a biomarker for intracerebral haemorrhage in patients with acute stroke. *J Neurol Neurosurg Psychiatry* 2006;77:181-4.
151. U. Fiszer GK-K, W. Palasik JK, A. Gorski,, Wonkowska A. Increased expression of adhesion molecule CD18 (LFA-1beta) on the leukocytes of peripheral blood in patients with acute ischemic stroke. *Acta Neurol Scand* 1998;97:221-4.
152. Klaus Fassbender RS, Andreas Schreiner, Mark Fatar, Frank Muhlhauser,, Michael Daffertshofer MH. Leakage of brain-originated proteins in peripheral blood temporal profile and diagnostic value in early ischemic stroke. *Journal of Neurological Sciences* 1997;148:105-9.
153. Fang C, Lou B, Zhou J, Zhong R, Wang R, Zang X, et al. Blood biomarkers in ischemic stroke: Role of biomarkers in differentiation of clinical phenotype. *European Journal of Inflammation* 2018;16.
154. Ewida HA, Zayed RK, Darwish HA, Shaheen AA. Circulating lncRNAs HIF1A-AS2 and LINLK-A: Role and Relation to Hypoxia-Inducible Factor-1alpha in Cerebral Stroke Patients. *Mol Neurobiol* 2021;58:4564-74.
155. Ekingen E, Yilmaz M, Yildiz M, Atescelik M, Goktekin MC, Gurger M, et al. Utilization of glial fibrillary acidic protein and galectin-3 in the diagnosis of cerebral infarction patients with normal cranial tomography. *Niger J Clin Pract* 2017;20:433-7.
156. Dvorak F, Haberer I, Sitzer M, Foerch C. Characterisation of the diagnostic window of serum glial fibrillary acidic protein for the differentiation of intracerebral haemorrhage and ischaemic stroke. *Cerebrovasc Dis* 2009;27:37-41.
157. Duan XX, Zhang GP, Wang XB, Yu H, Wu JL, Liu KZ, et al. The diagnostic and prognostic value of serum CXCL12 levels in patients with ischemic stroke. *Neurol Sci* 2015;36:2227-34.
158. De Marchis GM, Katan M, Barro C, Fladt J, Traenka C, Seiffge DJ, et al. Serum neurofilament light chain in patients with acute cerebrovascular events. *Eur J Neurol* 2018;25:562-8.

159. Dassan P, Keir G, Jager HR, Brown MM. Value of measuring serum vascular endothelial growth factor levels in diagnosing acute ischemic stroke. *Int J Stroke* 2012;7:454-9.
160. Dambinova. Blood test detecting autoantibodies to N-methyl-D-aspartate neuroreceptors for evaluation of patients with transient ischemic attack and stroke. 2003.
161. Dambinova SA, Bettermann K, Glynn T, Tews M, Olson D, Weissman JD, et al. Diagnostic potential of the NMDA receptor peptide assay for acute ischemic stroke. *PLoS One* 2012;7:e42362.
162. Cheng X, Kan P, Ma Z, Wang Y, Song W, Huang C, et al. Exploring the potential value of miR-148b-3p, miR-151b and miR-27b-3p as biomarkers in acute ischemic stroke. *Biosci Rep* 2018;38.
163. Chen Z, Wang K, Huang J, Zheng G, Lv Y, Luo N, et al. Upregulated Serum MiR-146b Serves as a Biomarker for Acute Ischemic Stroke. *Cell Physiol Biochem* 2018;45:397-405.
164. Cavrak ME, Hass R, Stephens RJ, Adcock A, Petrone AB. Leukocyte Biomarkers for the Differential Diagnosis of Mild Acute Ischemic Stroke, Transient Ischemic Attack, and Stroke Mimic. *Cureus* 2021;13:e13383.
165. Climaco P, Cano VPBd, Herna'n E, Atencio, Mayerlim T, Medina, , Amell Anilsa AS, Omaira M. Molina, Helen Restrepo, Maria E. Vargas. Increased serum malondialdehyde and decreased nitric oxide within 24 hours of thrombotic stroke onset. *American Journal of Therapeutics* 2003;10:473–6.
166. Altunayoglu Cakmak V, Gunduz A, Karaca Y, Alioglu Z, Mentese A, Topbas M. Diagnostic Significance of Ischemia-Modified Albumin, S100b, and Neuron-Specific Enolase in Acute Ischemic Stroke. *Journal of Academic Emergency Medicine* 2014.
167. Buttner T, Weyers S, Postert T, Sprengelmeyer R, Kuhn W. S-100 protein: Serum marker of focal brain damage after ischemic territorial MCA infarction. *Stroke* 1997;28:1961-5.
168. Bustamante A, Penalba A, Orset C, Azurmendi L, Llombart V, Simats A, et al. Blood Biomarkers to Differentiate Ischemic and Hemorrhagic Strokes. *Neurology* 2021;96:e1928-e39.
169. Bustamante A, Lopez-Cancio E, Pich S, Penalba A, Giralt D, Garcia-Berrocoso T, et al. Blood Biomarkers for the Early Diagnosis of Stroke: The Stroke-Chip Study. *Stroke* 2017;48:2419-25.
170. Bolayir A, Gokce SF, Cigdem B, Bolayir HA, Gulunay A, Celik VK, et al. Can SCUBE1 be used to predict the early diagnosis, lesion volume and prognosis of acute ischemic stroke? *Turkish Journal of Biochemistry* 2019;44:16-24.
171. Bibl M, Welge V, Schmidt H, Esselmann H, Mollenhauer B, Lewczuk P, et al. Plasma amyloid-beta peptides in acute cerebral ischemia: a pilot study. *J Clin Lab Anal* 2012;26:238-45.
172. T.L. Barr, Y. Conley, J. Ding, A. Dillman, S. Warach, A. Singleton, et al. Genomic biomarkers and cellular pathways of ischemic stroke by RNA gene expression profiling. *Neurology* 2010;75:1009-14.
173. Azarpazhooh MR, Mobarra N, Parizadeh SM, Tavallaie S, Bagheri M, Rahsepar AA, et al. Serum high-sensitivity C-reactive protein and heat shock protein 27 antibody titers in patients with stroke and 6-month prognosis. *Angiology* 2010;61:607-12.
174. Atik I, Kozaci N, Beydilli I, Avci M, Ellidag H, Kesapli M. Investigation of oxidant and antioxidant levels in patients with acute stroke in the emergency service. *Am J Emerg Med* 2016;34:2379-83.

175. Alvarez-Perez FJ, Castelo-Branco M, Alvarez-Sabin J. Usefulness of measurement of fibrinogen, D-dimer, D-dimer/fibrinogen ratio, C reactive protein and erythrocyte sedimentation rate to assess the pathophysiology and mechanism of ischaemic stroke. *J Neurol Neurosurg Psychiatry* 2011;82:986-92.
176. Allard L, Lescuyer P, Burgess J, Leung KY, Ward M, Walter N, et al. ApoC-I and ApoC-III as potential plasmatic markers to distinguish between ischemic and hemorrhagic stroke. *Proteomics* 2004;4:2242-51.
177. Allard L, Burkhard PR, Lescuyer P, Burgess JA, Walter N, Hochstrasser DF, et al. PARK7 and nucleoside diphosphate kinase A as plasma markers for the early diagnosis of stroke. *Clin Chem* 2005;51:2043-51.
178. Algin A, Erdogan MO, Aydin I, Poyraz MK, Sirik M. Clinical usefulness of brain-derived neurotrophic factor and visinin-like protein-1 in early diagnostic tests for acute stroke. *Am J Emerg Med* 2019;37:2051-4.
179. Gheyath AlGawwam Zal, Maryam Emad Shake. Evaluation of glycogen phosphorylase bb (GPBB) level in serum as marker in diagnosis of acute ischemic stroke. *Indian Journal of Forensic Medicine & Toxicology* 2021;1603-1608.
180. Ahn JH, Choi SC, Lee WG, Jung YS. The usefulness of albumin-adjusted ischemia-modified albumin index as early detecting marker for ischemic stroke. *Neurol Sci* 2011;32:133-8.
181. Adly Sadik N, Ahmed Rashed L, Ahmed Abd-El Mawla M. Circulating miR-155 and JAK2/STAT3 Axis in Acute Ischemic Stroke Patients and Its Relation to Post-Ischemic Inflammation and Associated Ischemic Stroke Risk Factors. *Int J Gen Med* 2021;14:1469-84.
182. Abe A, Tanaka M, Yasuoka A, Saito Y, Okada S, Mishina M, et al. Changes in Whole-Blood microRNA Profiles during the Onset and Treatment Process of Cerebral Infarction: A Human Study. *Int J Mol Sci* 2020;21.
